# Supplementary material for: Forecasting severe respiratory disease hospitalizations using machine learning algorithms
Source: PubMed Central journal article supplement (PMC11462891; doi:10.1186/s12911-024-02702-0), 2024-10-09
Supplement: 12911_2024_2702_MOESM1_ESM.pdf [file 12911_2024_2702_MOESM1_ESM.pdf]

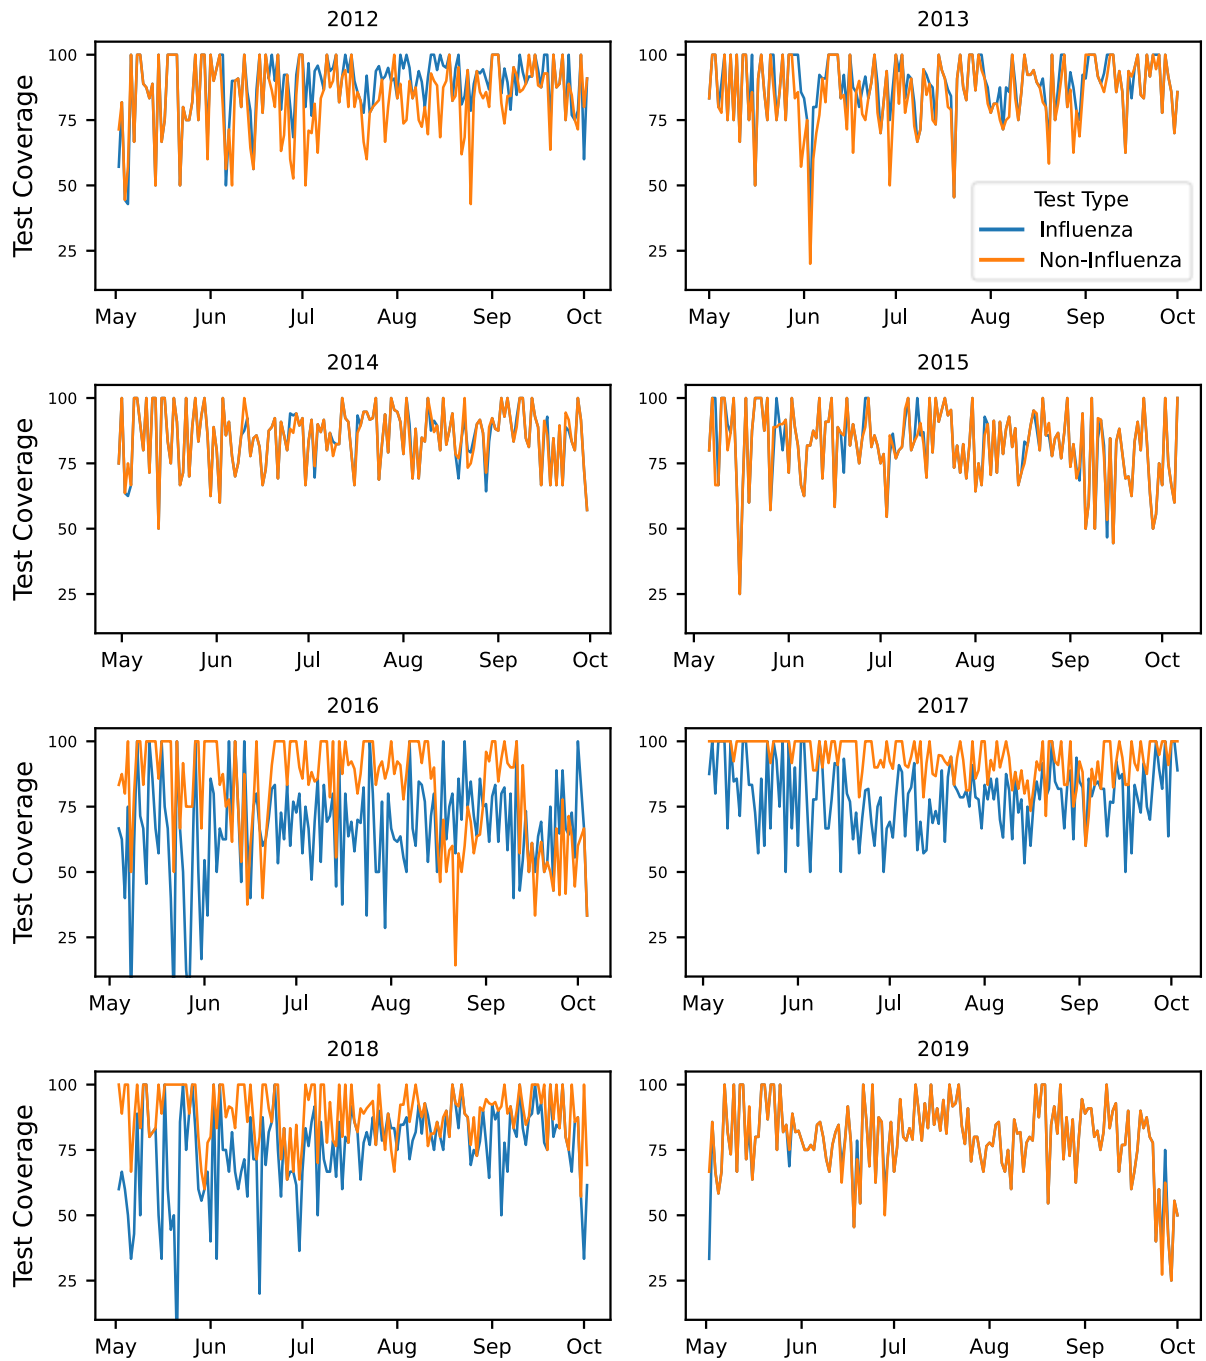

**Figure S1 – Percentage of SARI cases tested for influenza or other viruses**

*Percentage of SARI patients tested for influenza (blue line) or other viruses (orange line).*

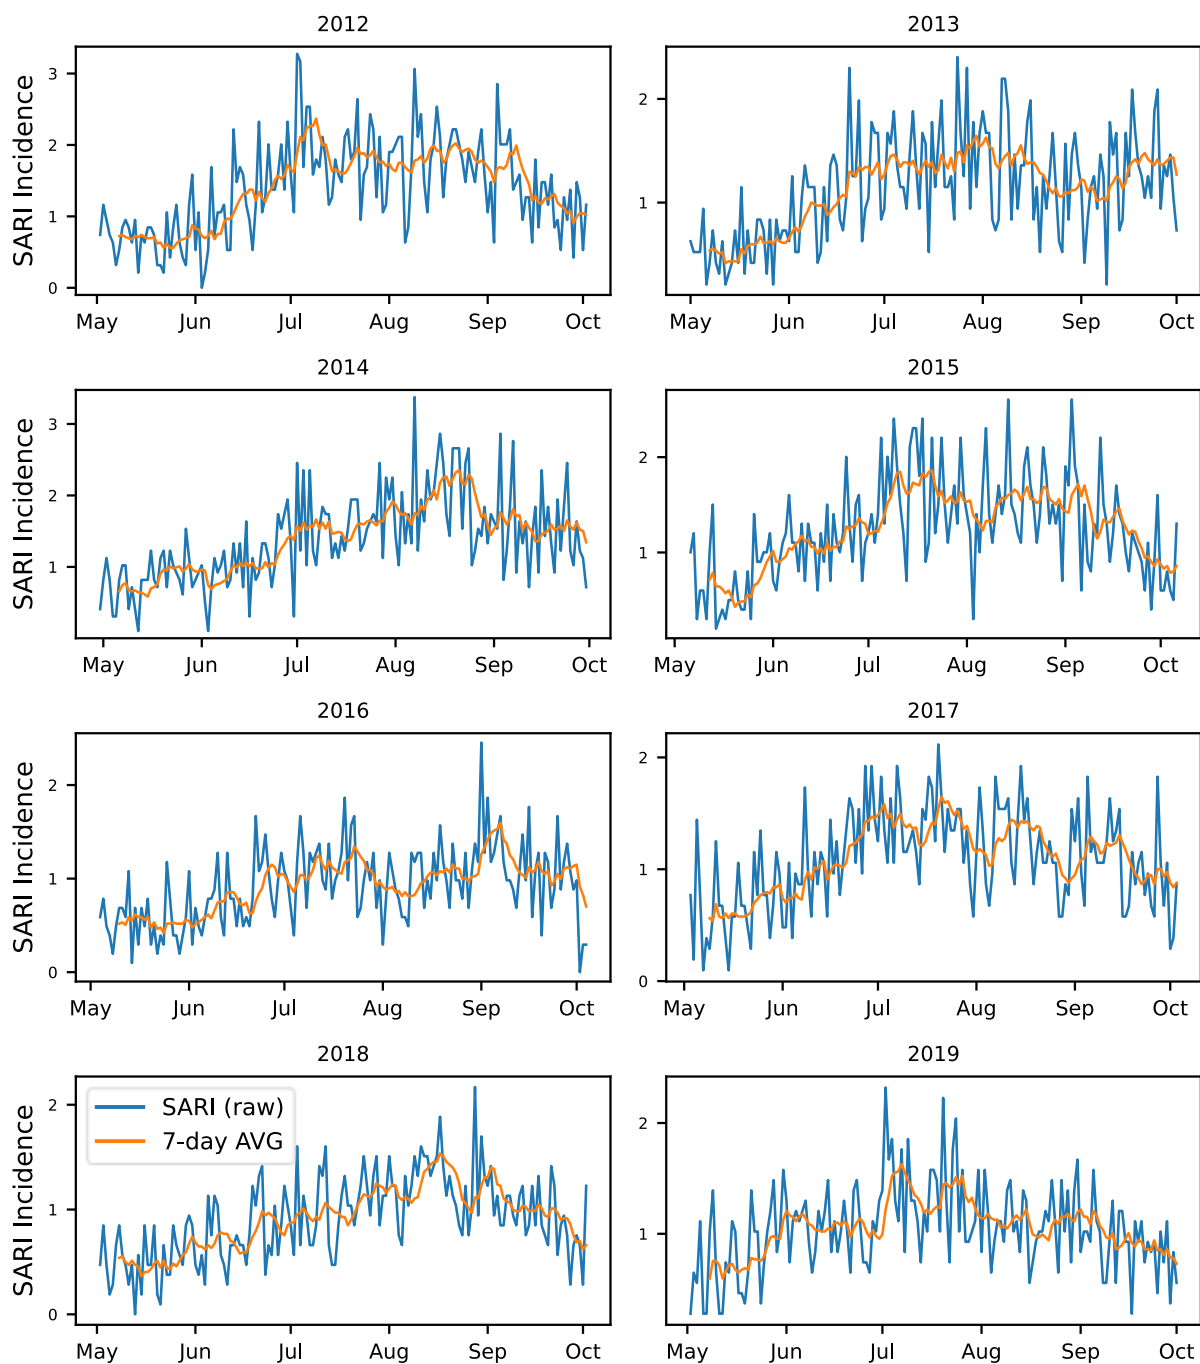

**Figure S2 – Raw SARI incidence and the 7-day sliding window average SARI**

*The blue line shows the raw SARI incidence at daily resolution. The SARI incidence describes hospitalizations categorized as SARI per 100,000 people based on the population of the districts covered by the two hospitals where the SARI surveillance has been implemented. Due to strong fluctuations, especially on weekend days, we decided to use a smoothed SARI incidence calculated as the average of the SARI incidence over the past 7 days (orange line).*

**a) Incidence for the age group “< 1 year” (blue) and the total SARI incidence (black)**

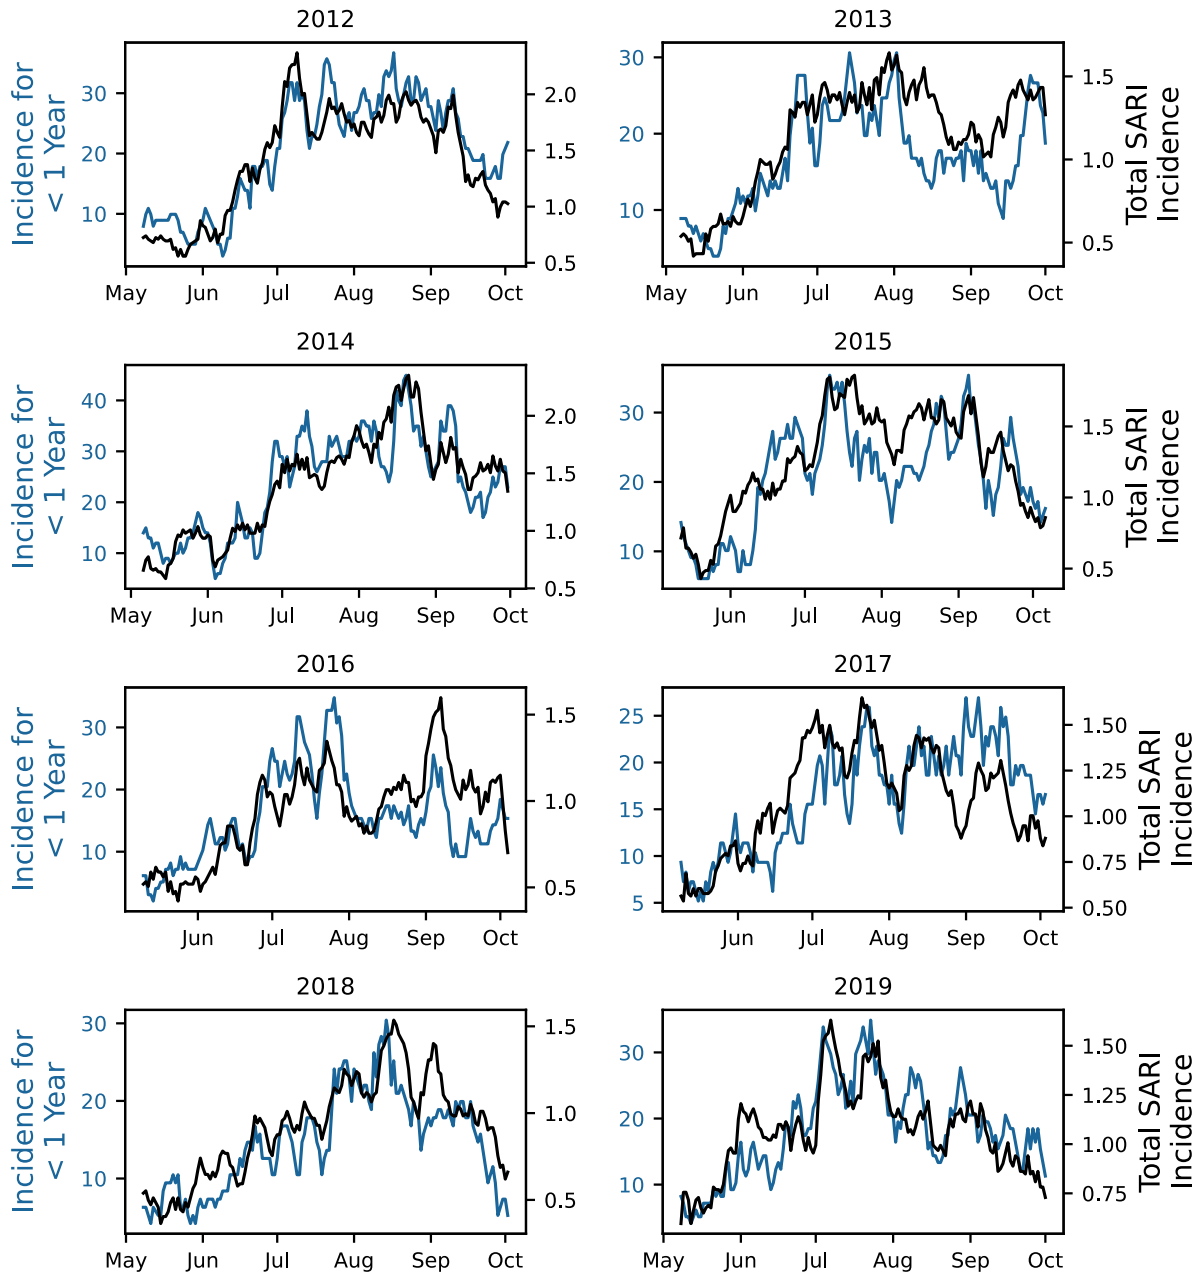

**b) Incidence for the age group “1 to 4 years” (blue) and total SARI incidence (black)**

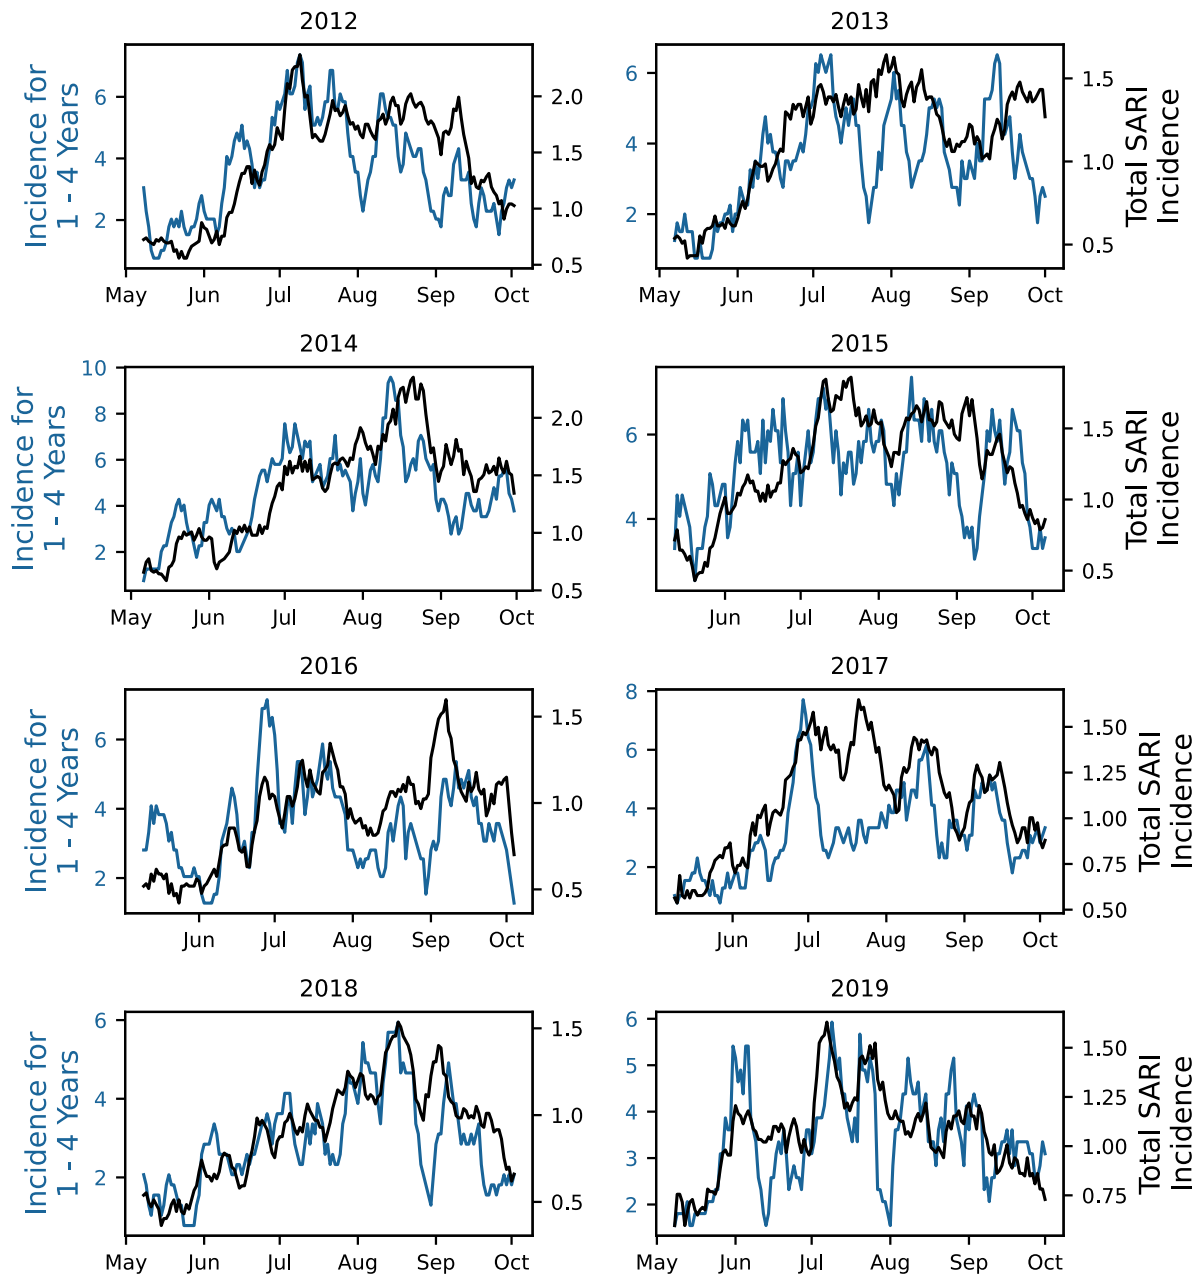

**c) Incidence for the age group “5 to 14 years” (blue) and total SARI incidence (black)**

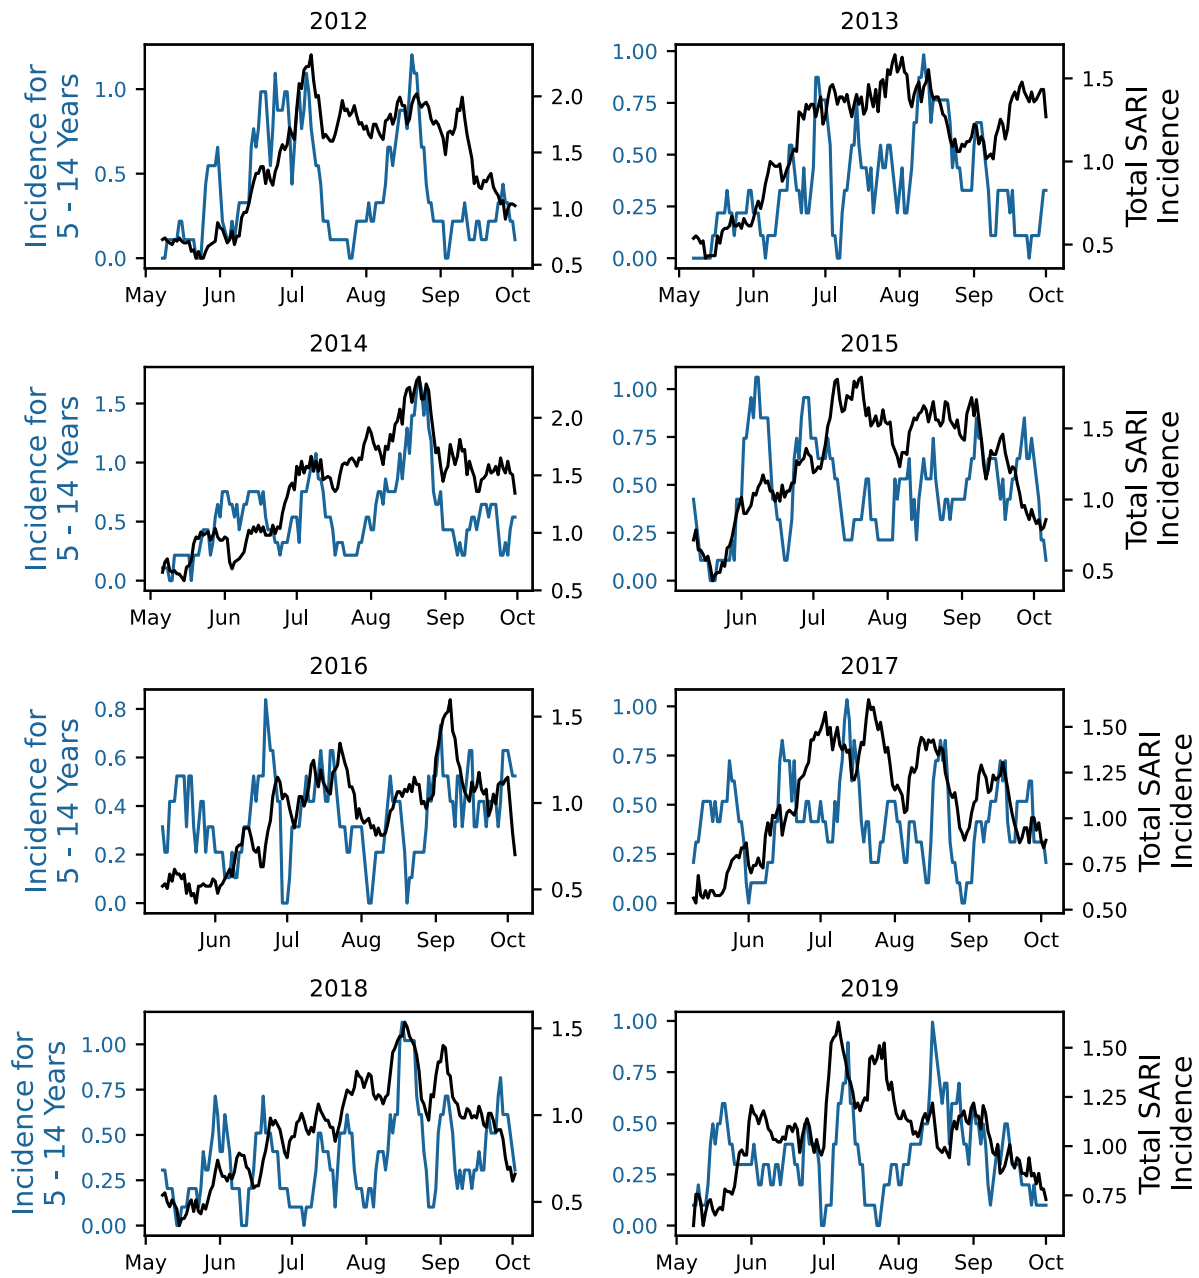

**d) Incidence for the age group “15 to 64 years” (blue) and total SARI incidence (black)**

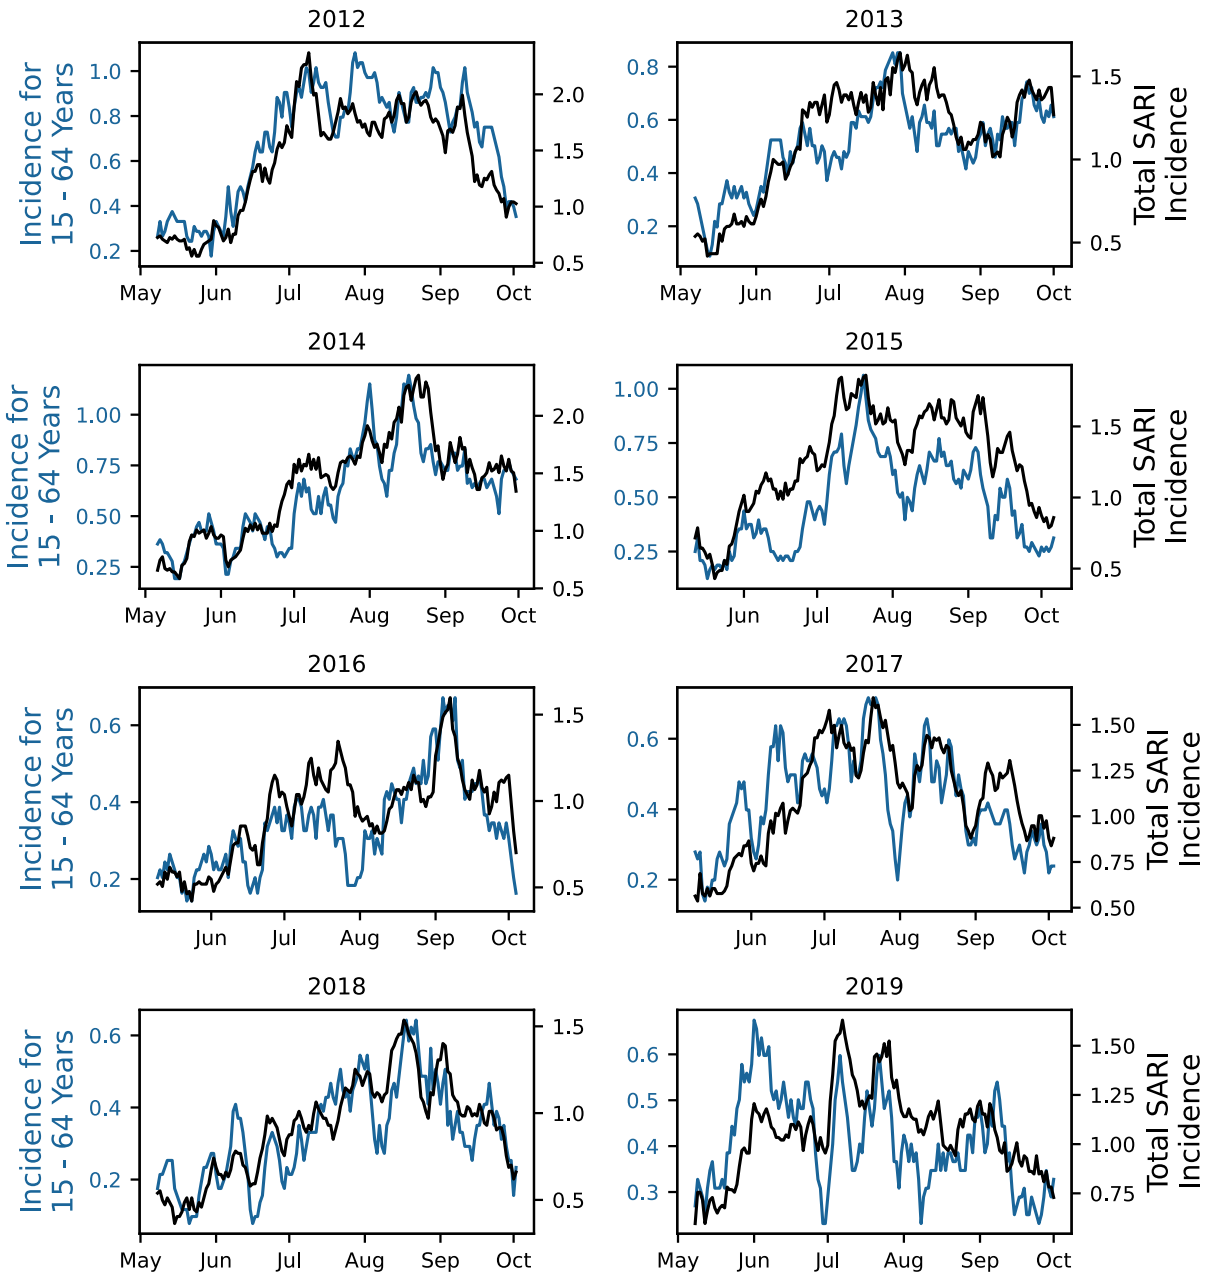

e) Incidence for the age group “65+ years” (blue) and total SARI incidence (black)

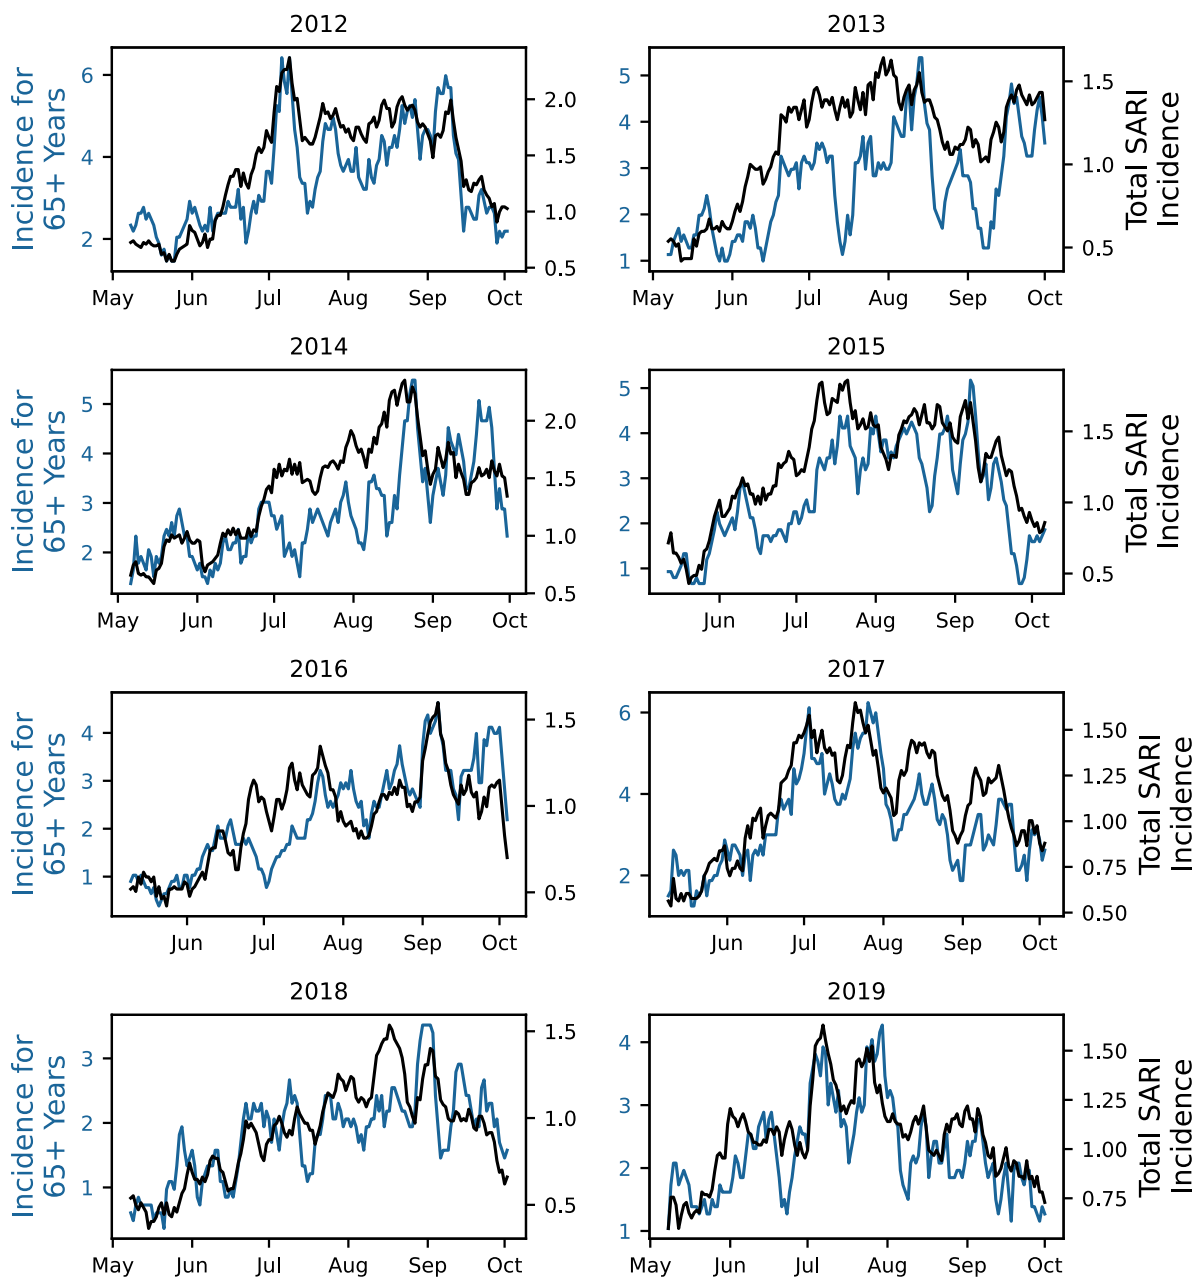

**Figure S3 – Comparison between the total SARI incidence and the SARI incidence specific to different age groups as indicated by the subtitles a) to e).**

*The black line describes the total SARI incidence (y-scale on the right-hand side). The blue line (y-scale on the left-hand side) represents the SARI incidence by age group. The incidence always describes SARI cases per 100,000 people using the population numbers available for the different years. For the “total SARI incidence,” the population size represents the number of people living in the districts covered by the two public hospitals where the SARI surveillance is implemented. For the age group-specific incidence, a subpopulation for these districts is used that represents the number of people of a certain age as specified by the corresponding age group.*

**a) Positive rate of influenza (FLU), respiratory syncytial virus (RSV), and rhinovirus (RV) (colored lines) in comparison to the total SARI incidence (black).**

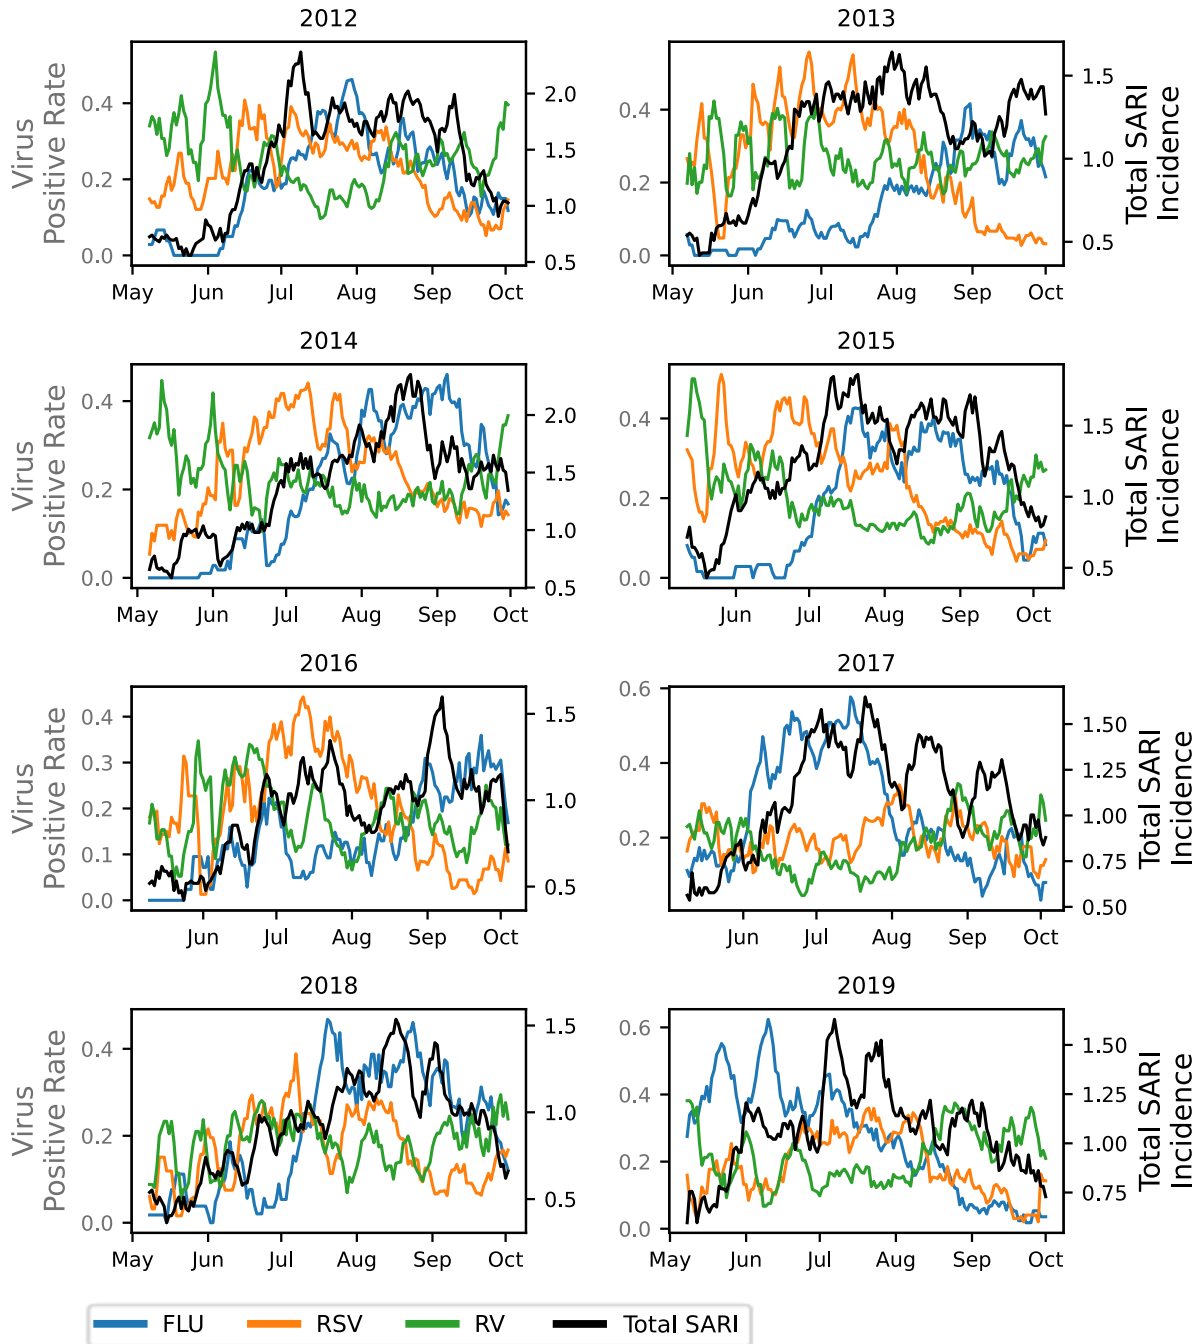



**b) Positive rate of enterovirus (ENTV), adenovirus (ADV), human metapneumovirus (HMPV), and parainfluenza virus 1-3 (PIV) in comparison to the total SARI incidence (black).**

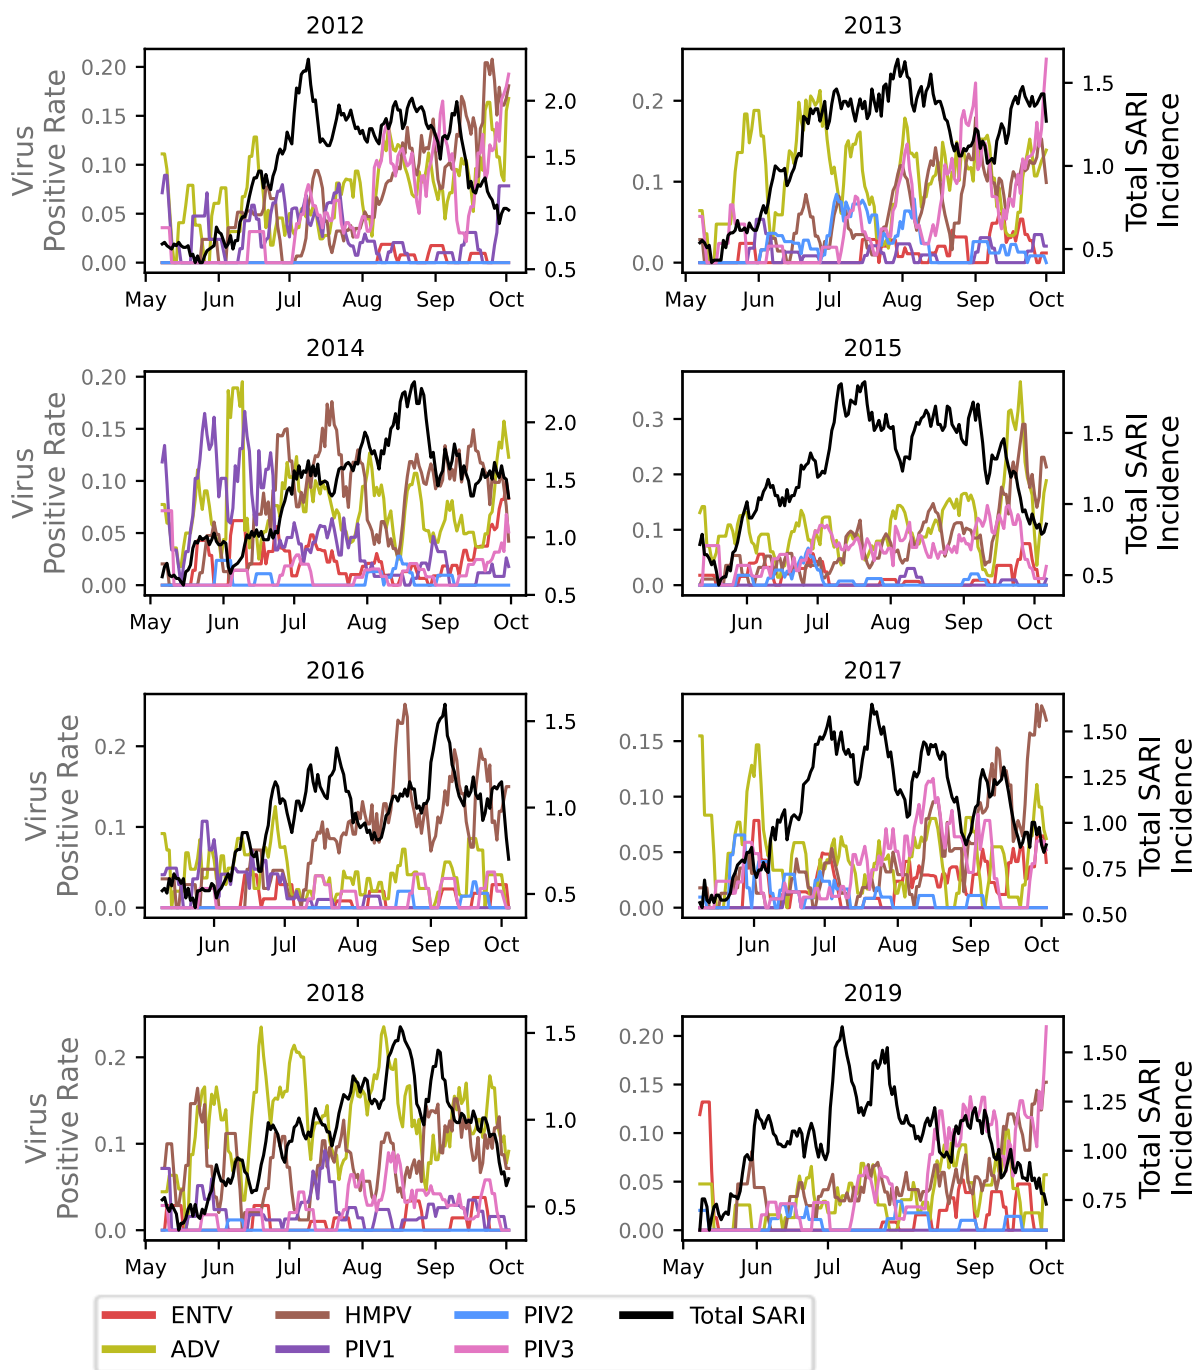

**Figure S4 – Comparison between the total SARI incidence and the positive rates of different viruses derived from the laboratory component.**

*The black line describes the total SARI incidence (y-scale on the right-hand side). The y-scale on the left-hand side describes the rate of positive tests for different viruses, shown by the colored lines.*

|                                                                                                                                                                                                                                                                                                                                       |
|---------------------------------------------------------------------------------------------------------------------------------------------------------------------------------------------------------------------------------------------------------------------------------------------------------------------------------------|
| <b>TFT – Temporal Fusion Transformer – <a href="#">link</a></b><br>'context_length':[ $h$ , $2*h$ ], 'hidden_dim':[32,64], 'variable_dim':[32,64], 'lr':[1e-2, 1e-3, 1e-4],<br>'dropout_rate':[0.1,0.2,0.5]                                                                                                                           |
| <b>DeepAR – <a href="#">link</a></b><br>'context_length':[ $h$ , $2*h$ ], 'num_layers':[2, 4], 'dropout_rate':[0.1,0.2,0.5],<br>'hidden_size':[40, 80], 'lr':[1e-2, 1e-3, 1e-4]                                                                                                                                                       |
| <b>ARIMA – using the <a href="#">AutoARIMA</a> model</b><br>'max_p':[ $2*h$ ], 'max_q':[ $2*h$ ], 'max_d':[3], 'seasonal':[False], 'allowdrift':[True,False],<br>'allowmean':[True, False], 'stationary':[True,False], 'max_ts_length':[750,1500,2500]                                                                                |
| <b>SARIMA – using the <a href="#">AutoARIMA</a> model</b><br>'max_p':[ $2*h$ ], 'max_q':[ $2*h$ ], 'max_d':[3], 'max_P':[ $2*h$ ], 'max_Q':[ $2*h$ ], 'max_D':[3],<br>'seasonal':[True], 'seasonal_period':[365], 'allowdrift':[True,False],<br>'max_ts_length':[750,1500,2500], 'allowmean':[True, False], 'stationary':[True,False] |
| <b>ETS – using the <a href="#">AutoETS</a> model</b><br>'model':['ZZZ'], 'seasonal_period':[None, 365], 'damped':[True, False],<br>'max_ts_length':[750,1500,2500]                                                                                                                                                                    |
| <b>NPTS – <a href="#">link</a></b><br>'kernel_type':['exponential', 'uniform'], 'use_seasonal_model':[True, False],<br>'exp_kernel_weights':[1,2,3], 'num_default_time_features':[1,2,3],<br>'max_ts_length':[750,1500,2500]                                                                                                          |
| <b>CrostonSBA – <a href="#">link</a></b><br>'max_ts_length':[750,1500,2500]                                                                                                                                                                                                                                                           |
| <b>Chronos – <a href="#">link</a></b><br>'model_path':['large'], 'batch_size':[16, 32, 64], 'num_samples':[20,40,80],<br>'context_length':[None, $h$ , $2*h$ , $4*h$ ]                                                                                                                                                                |
| <b>Theta – <a href="#">link</a></b><br>'decomposition_type':['multiplicative', 'additive'], 'seasonal_period':[None, 365],<br>'max_ts_length':[750,1500,2500]                                                                                                                                                                         |
| <b>PatchTST – <a href="#">link</a></b><br>'context_length':[ $h$ , 96], 'patch_len':[8, 16], 'stride':[8, 16], 'd_model':[32, 64], 'nhead':[4,8],<br>'lr':[1e-3, 1e-2, 1e-4], 'batch_size':[32,64]                                                                                                                                    |

**Table S1 – Parameters explored within the grid search applied for hyperparameter tuning.**

The library AutoGluon-TS provides the implementation of all algorithms used. For ARIMA and ETS, automated solutions were leveraged that automatically explore different settings for the orders (ARIMA and SARIMA) or configuration of the model components (ETS). Some parameter settings depend on the size of the horizon as indicated by the  $h$ , which is 21 days in all experiments.

| 1-Day Horizon |            |            | 2014         |              |              | 2015         |              |              | 2016         |              |              |
|---------------|------------|------------|--------------|--------------|--------------|--------------|--------------|--------------|--------------|--------------|--------------|
| Algorithm     | Covariates | Parameters | MAPE         | MAE          | RMSE         | MAPE         | MAE          | RMSE         | MAPE         | MAE          | RMSE         |
| ARIMA         | no         | default    | 0.139        | 0.197        | 0.251        | 0.149        | 0.187        | 0.231        | 0.167        | 0.167        | 0.215        |
| ARIMA         | no         | tuned      | 0.139        | 0.197        | 0.251        | 0.149        | 0.187        | 0.231        | 0.167        | 0.167        | 0.215        |
| SARIMA        | no         | default    | 0.139        | 0.197        | 0.251        | 0.149        | 0.187        | 0.231        | 0.167        | 0.167        | 0.215        |
| SARIMA        | no         | tuned      | 0.139        | 0.200        | 0.253        | 0.149        | 0.187        | 0.231        | 0.167        | 0.167        | 0.215        |
| ETS           | no         | default    | 0.139        | 0.197        | 0.251        | 0.149        | 0.187        | 0.231        | 0.167        | 0.167        | 0.215        |
| ETS           | no         | tuned      | 0.139        | 0.200        | 0.253        | 0.149        | 0.187        | 0.231        | 0.167        | 0.167        | 0.215        |
| Theta         | no         | default    | 0.139        | 0.197        | 0.251        | 0.149        | 0.187        | 0.231        | 0.167        | 0.167        | 0.215        |
| Theta         | no         | tuned      | 0.139        | 0.200        | 0.253        | 0.149        | 0.187        | 0.231        | 0.167        | 0.167        | 0.215        |
| CrostonSBA    | no         | default    | 0.139        | 0.197        | 0.251        | 0.149        | 0.187        | 0.231        | 0.167        | 0.167        | 0.215        |
| CrostonSBA    | no         | tuned      | 0.139        | 0.197        | 0.251        | 0.149        | 0.187        | 0.231        | 0.167        | 0.167        | 0.215        |
| NPTS          | no         | default    | 0.570        | 0.874        | 0.936        | 0.514        | 0.718        | 0.771        | 0.393        | 0.420        | 0.475        |
| NPTS          | no         | tuned      | 0.223        | 0.341        | 0.454        | 0.234        | 0.285        | 0.367        | 0.442        | 0.400        | 0.461        |
| PatchTST      | no         | default    | 0.143        | 0.191        | 0.251        | 0.134        | 0.159        | 0.211        | 0.120        | 0.106        | 0.131        |
| PatchTST      | no         | tuned      | 0.076        | 0.103        | 0.137        | 0.068        | 0.088        | 0.112        | 0.082        | 0.077        | 0.096        |
| Chronos       | no         | default    | <b>0.052</b> | <b>0.077</b> | <b>0.096</b> | <b>0.050</b> | <b>0.066</b> | <b>0.081</b> | 0.055        | 0.053        | 0.068        |
| Chronos       | no         | tuned      | <b>0.053</b> | <b>0.077</b> | <b>0.092</b> | <b>0.051</b> | <b>0.066</b> | <b>0.080</b> | 0.054        | 0.053        | 0.067        |
| TFT           | no         | default    | 0.112        | 0.159        | 0.203        | 0.085        | 0.107        | 0.149        | 0.096        | 0.092        | 0.119        |
| TFT           | no         | tuned      | 0.079        | 0.111        | 0.143        | 0.064        | 0.080        | 0.104        | 0.100        | 0.097        | 0.124        |
| TFT           | AGE        | default    | 0.140        | 0.194        | 0.237        | 0.115        | 0.145        | 0.184        | 0.141        | 0.132        | 0.174        |
| TFT           | AGE        | tuned      | 0.096        | 0.130        | 0.169        | 0.078        | 0.100        | 0.124        | 0.103        | 0.098        | 0.126        |
| TFT           | LC         | default    | 0.200        | 0.254        | 0.310        | 0.194        | 0.261        | 0.331        | 0.168        | 0.158        | 0.214        |
| TFT           | LC         | tuned      | 0.116        | 0.149        | 0.211        | 0.109        | 0.144        | 0.210        | 0.119        | 0.110        | 0.159        |
| TFT           | AGE+LC     | default    | 0.189        | 0.252        | 0.319        | 0.207        | 0.275        | 0.368        | 0.151        | 0.142        | 0.194        |
| TFT           | AGE+LC     | tuned      | 0.124        | 0.151        | 0.219        | 0.086        | 0.111        | 0.149        | 0.126        | 0.118        | 0.151        |
| DeepAR        | no         | default    | 0.116        | 0.158        | 0.191        | 0.129        | 0.156        | 0.194        | 0.114        | 0.105        | 0.132        |
| DeepAR        | no         | tuned      | 0.076        | 0.104        | 0.128        | 0.100        | 0.124        | 0.186        | 0.070        | 0.064        | 0.090        |
| DeepAR        | AGE        | default    | 0.089        | 0.118        | 0.152        | 0.085        | 0.101        | 0.136        | <b>0.049</b> | <b>0.047</b> | <b>0.059</b> |
| DeepAR        | AGE        | tuned      | 0.064        | <b>0.085</b> | 0.118        | 0.065        | 0.078        | 0.097        | <b>0.047</b> | <b>0.046</b> | <b>0.058</b> |
| DeepAR        | LC         | default    | 0.107        | 0.138        | 0.195        | 0.087        | 0.102        | 0.140        | 0.067        | 0.060        | 0.072        |
| DeepAR        | LC         | tuned      | 0.063        | 0.086        | <b>0.111</b> | 0.062        | 0.076        | 0.100        | 0.052        | <b>0.048</b> | <b>0.061</b> |
| DeepAR        | AGE+LC     | default    | 0.137        | 0.181        | 0.313        | 0.081        | 0.099        | 0.135        | 0.059        | 0.054        | 0.068        |
| DeepAR        | AGE+LC     | tuned      | <b>0.062</b> | 0.090        | 0.114        | <b>0.052</b> | <b>0.069</b> | <b>0.080</b> | <b>0.050</b> | 0.048        | 0.062        |

| 1-Day Horizon |            |            | 2017         |              |              | 2018         |              |              | 2019         |              |              |
|---------------|------------|------------|--------------|--------------|--------------|--------------|--------------|--------------|--------------|--------------|--------------|
| Algorithm     | Covariates | Parameters | MAPE         | MAE          | RMSE         | MAPE         | MAE          | RMSE         | MAPE         | MAE          | RMSE         |
| ARIMA         | no         | default    | 0.156        | 0.177        | 0.214        | 0.164        | 0.157        | 0.198        | 0.140        | 0.160        | 0.204        |
| ARIMA         | no         | tuned      | 0.156        | 0.177        | 0.214        | 0.164        | 0.157        | 0.198        | 0.140        | 0.160        | 0.204        |
| SARIMA        | no         | default    | 0.156        | 0.177        | 0.214        | 0.164        | 0.157        | 0.198        | 0.140        | 0.160        | 0.204        |
| SARIMA        | no         | tuned      | 0.156        | 0.177        | 0.214        | 0.164        | 0.157        | 0.198        | 0.140        | 0.160        | 0.204        |
| ETS           | no         | default    | 0.156        | 0.177        | 0.214        | 0.164        | 0.157        | 0.198        | 0.140        | 0.160        | 0.204        |
| ETS           | no         | tuned      | 0.156        | 0.177        | 0.214        | 0.164        | 0.157        | 0.198        | 0.140        | 0.160        | 0.204        |
| Theta         | no         | default    | 0.156        | 0.177        | 0.214        | 0.164        | 0.157        | 0.198        | 0.140        | 0.160        | 0.204        |
| Theta         | no         | tuned      | 0.156        | 0.177        | 0.214        | 0.164        | 0.157        | 0.198        | 0.140        | 0.160        | 0.204        |
| CrostonSBA    | no         | default    | 0.156        | 0.177        | 0.214        | 0.164        | 0.157        | 0.198        | 0.140        | 0.160        | 0.204        |
| CrostonSBA    | no         | tuned      | 0.156        | 0.177        | 0.214        | 0.164        | 0.157        | 0.198        | 0.140        | 0.160        | 0.204        |
| NPTS          | no         | default    | 0.495        | 0.601        | 0.643        | 0.443        | 0.462        | 0.514        | 0.592        | 0.668        | 0.691        |
| NPTS          | no         | tuned      | 0.222        | 0.258        | 0.297        | 0.299        | 0.258        | 0.320        | 0.213        | 0.242        | 0.298        |
| PatchTST      | no         | default    | 0.136        | 0.142        | 0.189        | 0.123        | 0.104        | 0.128        | 0.150        | 0.158        | 0.202        |
| PatchTST      | no         | tuned      | 0.078        | 0.081        | 0.105        | 0.064        | 0.058        | 0.077        | 0.067        | 0.073        | 0.086        |
| Chronos       | no         | default    | 0.048        | <b>0.054</b> | 0.068        | 0.051        | 0.047        | 0.058        | 0.046        | 0.051        | 0.066        |
| Chronos       | no         | tuned      | 0.049        | 0.055        | 0.071        | 0.049        | 0.045        | 0.057        | 0.046        | 0.051        | 0.066        |
| TFT           | no         | default    | 0.079        | 0.091        | 0.118        | 0.080        | 0.076        | 0.101        | 0.079        | 0.087        | 0.112        |
| TFT           | no         | tuned      | 0.076        | 0.083        | 0.108        | 0.063        | 0.056        | 0.072        | 0.067        | 0.081        | 0.102        |
| TFT           | AGE        | default    | 0.102        | 0.116        | 0.147        | 0.106        | 0.099        | 0.132        | 0.115        | 0.125        | 0.165        |
| TFT           | AGE        | tuned      | 0.071        | 0.079        | 0.105        | 0.087        | 0.077        | 0.096        | 0.075        | 0.082        | 0.106        |
| TFT           | LC         | default    | 0.110        | 0.124        | 0.157        | 0.130        | 0.118        | 0.148        | 0.140        | 0.151        | 0.200        |
| TFT           | LC         | tuned      | 0.090        | 0.100        | 0.142        | 0.077        | 0.072        | 0.092        | 0.069        | 0.077        | 0.105        |
| TFT           | AGE+LC     | default    | 0.147        | 0.167        | 0.208        | 0.124        | 0.114        | 0.141        | 0.133        | 0.145        | 0.192        |
| TFT           | AGE+LC     | tuned      | 0.088        | 0.096        | 0.121        | 0.094        | 0.083        | 0.113        | 0.078        | 0.078        | 0.107        |
| DeepAR        | no         | default    | 0.086        | 0.095        | 0.118        | 0.071        | 0.067        | 0.084        | 0.064        | 0.072        | 0.105        |
| DeepAR        | no         | tuned      | 0.054        | 0.058        | 0.077        | 0.055        | 0.048        | 0.061        | 0.048        | 0.053        | 0.073        |
| DeepAR        | AGE        | default    | 0.057        | 0.063        | 0.080        | 0.050        | 0.046        | 0.058        | 0.051        | 0.055        | 0.079        |
| DeepAR        | AGE        | tuned      | <b>0.045</b> | <b>0.050</b> | <b>0.063</b> | <b>0.045</b> | <b>0.041</b> | <b>0.052</b> | <b>0.039</b> | <b>0.043</b> | <b>0.056</b> |
| DeepAR        | LC         | default    | 0.064        | 0.069        | 0.088        | 0.057        | 0.049        | 0.063        | 0.059        | 0.065        | 0.094        |
| DeepAR        | LC         | tuned      | <b>0.046</b> | <b>0.052</b> | <b>0.065</b> | <b>0.043</b> | <b>0.040</b> | <b>0.052</b> | <b>0.039</b> | <b>0.043</b> | <b>0.061</b> |
| DeepAR        | AGE+LC     | default    | 0.059        | 0.064        | 0.085        | 0.054        | 0.047        | 0.059        | 0.063        | 0.067        | 0.099        |
| DeepAR        | AGE+LC     | tuned      | <b>0.048</b> | 0.056        | <b>0.067</b> | <b>0.044</b> | <b>0.043</b> | <b>0.054</b> | <b>0.045</b> | <b>0.048</b> | <b>0.064</b> |

| 7-Days Horizon |            |            | 2014         |              |              | 2015         |              |              | 2016         |              |              |
|----------------|------------|------------|--------------|--------------|--------------|--------------|--------------|--------------|--------------|--------------|--------------|
| Algorithm      | Covariates | Parameters | MAPE         | MAE          | RMSE         | MAPE         | MAE          | RMSE         | MAPE         | MAE          | RMSE         |
| ARIMA          | no         | default    | <b>0.135</b> | <b>0.197</b> | <b>0.250</b> | 0.138        | 0.179        | 0.222        | 0.169        | 0.172        | 0.220        |
| ARIMA          | no         | tuned      | <b>0.135</b> | <b>0.197</b> | <b>0.250</b> | 0.138        | 0.179        | 0.222        | 0.169        | 0.172        | 0.220        |
| SARIMA         | no         | default    | <b>0.135</b> | <b>0.197</b> | <b>0.250</b> | 0.138        | 0.179        | 0.222        | 0.169        | 0.172        | 0.220        |
| SARIMA         | no         | tuned      | 0.154        | 0.223        | 0.281        | 0.138        | 0.179        | 0.222        | 0.169        | 0.172        | 0.220        |
| ETS            | no         | default    | <b>0.135</b> | <b>0.197</b> | <b>0.250</b> | 0.138        | 0.179        | 0.222        | 0.169        | 0.172        | 0.220        |
| ETS            | no         | tuned      | 0.154        | 0.223        | 0.281        | 0.138        | 0.179        | 0.222        | 0.169        | 0.172        | 0.220        |
| Theta          | no         | default    | <b>0.135</b> | <b>0.197</b> | <b>0.250</b> | 0.138        | 0.179        | 0.222        | 0.169        | 0.172        | 0.220        |
| Theta          | no         | tuned      | 0.154        | 0.223        | 0.281        | 0.138        | 0.179        | 0.222        | 0.169        | 0.172        | 0.220        |
| CrostonSBA     | no         | default    | <b>0.135</b> | <b>0.197</b> | <b>0.250</b> | 0.138        | 0.179        | 0.222        | 0.169        | 0.172        | 0.220        |
| CrostonSBA     | no         | tuned      | <b>0.135</b> | <b>0.197</b> | <b>0.250</b> | 0.138        | 0.179        | 0.222        | 0.169        | 0.172        | 0.220        |
| NPTS           | no         | default    | 0.589        | 0.928        | 0.996        | 0.508        | 0.722        | 0.777        | 0.508        | 0.534        | 0.573        |
| NPTS           | no         | tuned      | 0.276        | 0.429        | 0.581        | 0.237        | 0.292        | 0.374        | 0.445        | 0.415        | 0.471        |
| PatchTST       | no         | default    | 0.186        | 0.265        | 0.322        | 0.165        | 0.208        | 0.265        | 0.190        | 0.180        | 0.218        |
| PatchTST       | no         | tuned      | 0.205        | 0.269        | 0.347        | 0.185        | 0.207        | 0.239        | 0.189        | 0.171        | <b>0.202</b> |
| Chronos        | no         | default    | <b>0.147</b> | <b>0.216</b> | <b>0.279</b> | 0.148        | 0.198        | 0.245        | 0.191        | 0.193        | 0.240        |
| Chronos        | no         | tuned      | <b>0.147</b> | <b>0.220</b> | <b>0.279</b> | 0.173        | 0.210        | 0.269        | 0.187        | 0.188        | 0.234        |
| TFT            | no         | default    | 0.173        | 0.237        | 0.297        | <b>0.123</b> | <b>0.158</b> | <b>0.200</b> | 0.192        | 0.184        | 0.234        |
| TFT            | no         | tuned      | 0.166        | 0.221        | 0.311        | 0.151        | 0.193        | 0.247        | 0.184        | 0.167        | 0.245        |
| TFT            | AGE        | default    | 0.187        | 0.259        | 0.315        | 0.158        | 0.198        | 0.237        | 0.176        | 0.172        | 0.228        |
| TFT            | AGE        | tuned      | 0.177        | 0.241        | 0.326        | 0.163        | 0.234        | 0.311        | 0.179        | 0.174        | 0.206        |
| TFT            | LC         | default    | 0.238        | 0.313        | 0.413        | 0.228        | 0.306        | 0.382        | 0.166        | <b>0.160</b> | 0.212        |
| TFT            | LC         | tuned      | 0.207        | 0.265        | 0.398        | <b>0.123</b> | 0.165        | 0.206        | 0.178        | 0.177        | 0.224        |
| TFT            | AGE+LC     | default    | 0.245        | 0.330        | 0.409        | 0.224        | 0.305        | 0.407        | 0.172        | 0.165        | 0.216        |
| TFT            | AGE+LC     | tuned      | 0.195        | 0.254        | 0.330        | <b>0.112</b> | <b>0.151</b> | 0.206        | 0.212        | 0.206        | 0.257        |
| DeepAR         | no         | default    | 0.193        | 0.282        | 0.345        | 0.207        | 0.252        | 0.308        | 0.169        | 0.169        | 0.219        |
| DeepAR         | no         | tuned      | 0.197        | 0.270        | 0.312        | 0.172        | 0.228        | 0.249        | 0.192        | 0.162        | 0.231        |
| DeepAR         | AGE        | default    | 0.208        | 0.289        | 0.363        | 0.241        | 0.295        | 0.367        | <b>0.164</b> | 0.162        | 0.211        |
| DeepAR         | AGE        | tuned      | 0.195        | 0.272        | 0.325        | 0.128        | 0.160        | <b>0.197</b> | <b>0.159</b> | <b>0.153</b> | <b>0.203</b> |
| DeepAR         | LC         | default    | 0.193        | 0.276        | 0.334        | 0.213        | 0.270        | 0.364        | 0.174        | 0.165        | <b>0.201</b> |
| DeepAR         | LC         | tuned      | 0.189        | 0.250        | 0.319        | 0.182        | 0.220        | 0.292        | 0.174        | 0.167        | 0.210        |
| DeepAR         | AGE+LC     | default    | 0.201        | 0.284        | 0.355        | 0.209        | 0.266        | 0.345        | 0.174        | 0.167        | 0.209        |
| DeepAR         | AGE+LC     | tuned      | 0.210        | 0.283        | 0.362        | 0.127        | <b>0.160</b> | <b>0.198</b> | <b>0.164</b> | <b>0.158</b> | 0.213        |
| 7-Days Horizon |            |            | 2017         |              |              | 2018         |              |              | 2019         |              |              |
| Algorithm      | Covariates | Parameters | MAPE         | MAE          | RMSE         | MAPE         | MAE          | RMSE         | MAPE         | MAE          | RMSE         |
| ARIMA          | no         | default    | 0.152        | 0.176        | 0.215        | 0.167        | 0.162        | 0.202        | 0.137        | 0.159        | 0.205        |
| ARIMA          | no         | tuned      | 0.152        | 0.176        | 0.215        | 0.167        | 0.162        | 0.202        | 0.137        | 0.159        | 0.205        |
| SARIMA         | no         | default    | 0.152        | 0.176        | 0.215        | 0.167        | 0.162        | 0.202        | 0.137        | 0.159        | 0.205        |
| SARIMA         | no         | tuned      | 0.152        | 0.176        | 0.215        | 0.167        | 0.162        | 0.202        | 0.137        | 0.159        | 0.205        |
| ETS            | no         | default    | 0.152        | 0.176        | 0.215        | 0.167        | 0.162        | 0.202        | 0.137        | 0.159        | 0.205        |
| ETS            | no         | tuned      | 0.152        | 0.176        | 0.215        | 0.167        | 0.162        | 0.202        | 0.137        | 0.159        | 0.205        |
| Theta          | no         | default    | 0.152        | 0.176        | 0.215        | 0.167        | 0.162        | 0.202        | 0.137        | 0.159        | 0.205        |
| Theta          | no         | tuned      | 0.152        | 0.176        | 0.215        | 0.167        | 0.162        | 0.202        | 0.137        | 0.159        | 0.205        |
| CrostonSBA     | no         | default    | 0.152        | 0.176        | 0.215        | 0.167        | 0.162        | 0.202        | 0.137        | 0.159        | 0.205        |
| CrostonSBA     | no         | tuned      | 0.152        | 0.176        | 0.215        | 0.167        | 0.162        | 0.202        | 0.137        | 0.159        | 0.205        |
| NPTS           | no         | default    | 0.560        | 0.682        | 0.718        | 0.499        | 0.519        | 0.560        | 0.578        | 0.661        | 0.688        |
| NPTS           | no         | tuned      | 0.232        | 0.268        | 0.327        | 0.285        | 0.256        | 0.321        | 0.212        | 0.237        | 0.295        |
| PatchTST       | no         | default    | 0.225        | 0.239        | 0.295        | 0.160        | 0.149        | 0.184        | 0.239        | 0.260        | 0.337        |
| PatchTST       | no         | tuned      | 0.198        | 0.190        | 0.223        | 0.159        | 0.138        | 0.170        | 0.156        | 0.155        | 0.195        |
| Chronos        | no         | default    | 0.161        | 0.191        | 0.237        | 0.183        | 0.180        | 0.220        | 0.146        | 0.173        | 0.235        |
| Chronos        | no         | tuned      | 0.144        | 0.160        | 0.200        | 0.185        | 0.178        | 0.212        | 0.148        | 0.169        | 0.230        |
| TFT            | no         | default    | 0.139        | <b>0.155</b> | <b>0.188</b> | 0.130        | 0.127        | 0.162        | 0.147        | 0.162        | 0.196        |
| TFT            | no         | tuned      | <b>0.131</b> | <b>0.149</b> | <b>0.183</b> | 0.140        | 0.139        | 0.172        | 0.157        | 0.188        | 0.220        |
| TFT            | AGE        | default    | 0.141        | <b>0.157</b> | 0.197        | <b>0.119</b> | <b>0.118</b> | <b>0.152</b> | 0.150        | 0.163        | 0.199        |
| TFT            | AGE        | tuned      | <b>0.134</b> | 0.166        | 0.196        | 0.149        | 0.135        | 0.166        | 0.152        | 0.169        | 0.205        |
| TFT            | LC         | default    | 0.147        | 0.165        | 0.205        | 0.147        | 0.144        | 0.178        | 0.172        | 0.187        | 0.237        |
| TFT            | LC         | tuned      | 0.164        | 0.191        | 0.230        | 0.133        | 0.132        | 0.168        | <b>0.128</b> | <b>0.149</b> | <b>0.186</b> |
| TFT            | AGE+LC     | default    | 0.168        | 0.194        | 0.242        | 0.141        | 0.137        | 0.168        | 0.175        | 0.190        | 0.242        |
| TFT            | AGE+LC     | tuned      | 0.174        | 0.191        | 0.245        | 0.136        | 0.136        | 0.176        | 0.157        | 0.168        | 0.202        |
| DeepAR         | no         | default    | 0.175        | 0.201        | 0.238        | 0.151        | 0.145        | 0.179        | 0.134        | 0.156        | 0.212        |
| DeepAR         | no         | tuned      | 0.189        | 0.194        | 0.250        | <b>0.119</b> | <b>0.112</b> | <b>0.142</b> | 0.143        | 0.165        | 0.208        |
| DeepAR         | AGE        | default    | 0.196        | 0.225        | 0.263        | 0.177        | 0.174        | 0.212        | 0.147        | 0.173        | 0.247        |
| DeepAR         | AGE        | tuned      | <b>0.132</b> | 0.158        | <b>0.195</b> | <b>0.123</b> | <b>0.123</b> | <b>0.150</b> | 0.131        | <b>0.152</b> | <b>0.195</b> |
| DeepAR         | LC         | default    | 0.187        | 0.213        | 0.251        | 0.178        | 0.170        | 0.207        | 0.143        | 0.170        | 0.248        |
| DeepAR         | LC         | tuned      | 0.154        | 0.174        | 0.235        | 0.129        | 0.125        | 0.160        | <b>0.125</b> | 0.152        | 0.223        |
| DeepAR         | AGE+LC     | default    | 0.194        | 0.221        | 0.265        | 0.187        | 0.177        | 0.209        | 0.160        | 0.186        | 0.260        |
| DeepAR         | AGE+LC     | tuned      | 0.145        | 0.175        | 0.210        | 0.135        | 0.134        | 0.163        | <b>0.113</b> | <b>0.142</b> | <b>0.193</b> |

| 14-Days Horizon |            |            | 2014         |              |              | 2015         |              |              | 2016         |              |              |
|-----------------|------------|------------|--------------|--------------|--------------|--------------|--------------|--------------|--------------|--------------|--------------|
| Algorithm       | Covariates | Parameters | MAPE         | MAE          | RMSE         | MAPE         | MAE          | RMSE         | MAPE         | MAE          | RMSE         |
| ARIMA           | no         | default    | <b>0.174</b> | <b>0.268</b> | <b>0.331</b> | 0.189        | 0.244        | 0.291        | 0.209        | 0.210        | 0.246        |
| ARIMA           | no         | tuned      | <b>0.174</b> | <b>0.268</b> | <b>0.331</b> | 0.189        | 0.244        | 0.291        | 0.209        | 0.210        | 0.246        |
| SARIMA          | no         | default    | <b>0.174</b> | <b>0.268</b> | <b>0.331</b> | 0.189        | 0.244        | 0.291        | 0.209        | 0.210        | 0.246        |
| SARIMA          | no         | tuned      | <b>0.187</b> | 0.307        | 0.419        | 0.223        | 0.244        | 0.291        | 0.209        | 0.210        | 0.246        |
| ETS             | no         | default    | <b>0.174</b> | <b>0.268</b> | <b>0.331</b> | 0.189        | 0.244        | 0.291        | 0.209        | 0.210        | 0.246        |
| ETS             | no         | tuned      | <b>0.187</b> | 0.307        | 0.419        | 0.223        | 0.244        | 0.291        | 0.209        | 0.210        | 0.246        |
| Theta           | no         | default    | <b>0.174</b> | <b>0.268</b> | <b>0.331</b> | 0.189        | 0.244        | 0.291        | 0.209        | 0.210        | 0.246        |
| Theta           | no         | tuned      | <b>0.187</b> | 0.307        | 0.419        | 0.223        | 0.244        | 0.291        | 0.209        | 0.210        | 0.246        |
| CrostonSBA      | no         | default    | <b>0.174</b> | <b>0.268</b> | <b>0.331</b> | 0.189        | 0.244        | 0.291        | 0.209        | 0.210        | 0.246        |
| CrostonSBA      | no         | tuned      | <b>0.174</b> | <b>0.268</b> | <b>0.331</b> | 0.189        | 0.244        | 0.291        | 0.209        | 0.210        | 0.246        |
| NPTS            | no         | default    | 0.634        | 1.007        | 1.063        | 0.515        | 0.741        | 0.792        | 0.542        | 0.577        | 0.608        |
| NPTS            | no         | tuned      | 0.316        | 0.464        | 0.620        | 0.238        | 0.296        | 0.381        | 0.422        | 0.412        | 0.472        |
| PatchTST        | no         | default    | 0.230        | 0.347        | 0.425        | 0.177        | 0.235        | 0.309        | 0.228        | 0.228        | 0.278        |
| PatchTST        | no         | tuned      | 0.243        | 0.363        | 0.428        | <b>0.154</b> | <b>0.211</b> | <b>0.264</b> | 0.206        | 0.211        | 0.254        |
| Chronos         | no         | default    | 0.192        | 0.306        | 0.391        | 0.190        | 0.256        | 0.310        | 0.232        | 0.236        | 0.277        |
| Chronos         | no         | tuned      | 0.193        | 0.302        | 0.376        | 0.227        | 0.293        | 0.346        | 0.233        | 0.240        | 0.256        |
| TFT             | no         | default    | 0.227        | 0.316        | 0.399        | <b>0.135</b> | <b>0.177</b> | <b>0.221</b> | <b>0.168</b> | <b>0.171</b> | 0.238        |
| TFT             | no         | tuned      | 0.220        | 0.328        | 0.381        | 0.185        | 0.223        | 0.295        | <b>0.168</b> | <b>0.171</b> | 0.238        |
| TFT             | AGE        | default    | 0.230        | 0.326        | 0.392        | <b>0.153</b> | <b>0.195</b> | <b>0.244</b> | 0.173        | 0.181        | 0.240        |
| TFT             | AGE        | tuned      | 0.251        | 0.392        | 0.453        | 0.208        | 0.240        | 0.295        | 0.173        | 0.192        | 0.248        |
| TFT             | LC         | default    | 0.253        | 0.347        | 0.476        | 0.268        | 0.353        | 0.432        | <b>0.155</b> | <b>0.157</b> | <b>0.214</b> |
| TFT             | LC         | tuned      | 0.304        | 0.406        | 0.519        | 0.197        | 0.263        | 0.298        | 0.226        | 0.219        | 0.254        |
| TFT             | AGE+LC     | default    | 0.313        | 0.435        | 0.535        | 0.258        | 0.351        | 0.448        | 0.172        | <b>0.170</b> | 0.227        |
| TFT             | AGE+LC     | tuned      | 0.256        | 0.342        | 0.450        | 0.185        | 0.249        | 0.315        | 0.239        | 0.244        | 0.298        |
| DeepAR          | no         | default    | 0.201        | 0.326        | 0.467        | 0.228        | 0.293        | 0.390        | 0.215        | 0.217        | 0.263        |
| DeepAR          | no         | tuned      | <b>0.173</b> | <b>0.272</b> | <b>0.358</b> | 0.170        | 0.231        | 0.308        | 0.221        | 0.216        | 0.281        |
| DeepAR          | AGE        | default    | 0.203        | <b>0.285</b> | 0.360        | 0.257        | 0.335        | 0.454        | 0.189        | 0.189        | 0.235        |
| DeepAR          | AGE        | tuned      | 0.199        | 0.310        | 0.382        | 0.193        | 0.260        | 0.329        | <b>0.169</b> | 0.177        | <b>0.216</b> |
| DeepAR          | LC         | default    | 0.218        | 0.323        | 0.410        | 0.249        | 0.332        | 0.436        | 0.208        | 0.200        | 0.258        |
| DeepAR          | LC         | tuned      | 0.210        | 0.296        | <b>0.307</b> | 0.258        | 0.305        | 0.373        | 0.193        | 0.206        | <b>0.226</b> |
| DeepAR          | AGE+LC     | default    | 0.244        | 0.352        | 0.428        | 0.253        | 0.349        | 0.460        | 0.226        | 0.225        | 0.271        |
| DeepAR          | AGE+LC     | tuned      | 0.227        | 0.308        | 0.363        | 0.211        | 0.275        | 0.324        | 0.195        | 0.191        | 0.263        |
| 14-Days Horizon |            |            | 2017         |              |              | 2018         |              |              | 2019         |              |              |
| Algorithm       | Covariates | Parameters | MAPE         | MAE          | RMSE         | MAPE         | MAE          | RMSE         | MAPE         | MAE          | RMSE         |
| ARIMA           | no         | default    | 0.213        | 0.245        | 0.281        | 0.177        | 0.173        | 0.206        | 0.150        | 0.169        | 0.213        |
| ARIMA           | no         | tuned      | 0.213        | 0.245        | 0.281        | 0.177        | 0.173        | 0.206        | 0.150        | 0.169        | 0.213        |
| SARIMA          | no         | default    | 0.213        | 0.245        | 0.281        | 0.177        | 0.173        | 0.206        | 0.150        | 0.169        | 0.213        |
| SARIMA          | no         | tuned      | 0.213        | 0.245        | 0.281        | 0.177        | 0.173        | 0.206        | 0.150        | 0.169        | 0.213        |
| ETS             | no         | default    | 0.213        | 0.245        | 0.281        | 0.177        | 0.173        | 0.206        | 0.150        | 0.169        | 0.213        |
| ETS             | no         | tuned      | 0.213        | 0.245        | 0.281        | 0.177        | 0.173        | 0.206        | 0.150        | 0.169        | 0.213        |
| Theta           | no         | default    | 0.213        | 0.245        | 0.281        | 0.177        | 0.173        | 0.206        | 0.150        | 0.169        | 0.213        |
| Theta           | no         | tuned      | 0.213        | 0.245        | 0.281        | 0.177        | 0.173        | 0.206        | 0.150        | 0.169        | 0.213        |
| CrostonSBA      | no         | default    | 0.213        | 0.245        | 0.281        | 0.177        | 0.173        | 0.206        | 0.150        | 0.169        | 0.213        |
| CrostonSBA      | no         | tuned      | 0.213        | 0.245        | 0.281        | 0.177        | 0.173        | 0.206        | 0.150        | 0.169        | 0.213        |
| NPTS            | no         | default    | 0.531        | 0.658        | 0.689        | 0.492        | 0.522        | 0.563        | 0.567        | 0.649        | 0.678        |
| NPTS            | no         | tuned      | 0.219        | 0.269        | 0.332        | 0.291        | 0.264        | 0.328        | 0.201        | 0.225        | 0.282        |
| PatchTST        | no         | default    | 0.229        | 0.252        | 0.315        | 0.189        | 0.182        | 0.219        | 0.303        | 0.320        | 0.394        |
| PatchTST        | no         | tuned      | 0.193        | 0.229        | 0.260        | 0.163        | 0.159        | 0.193        | 0.215        | 0.236        | 0.276        |
| Chronos         | no         | default    | 0.225        | 0.270        | 0.322        | 0.220        | 0.224        | 0.274        | 0.198        | 0.233        | 0.302        |
| Chronos         | no         | tuned      | 0.164        | 0.191        | 0.228        | 0.195        | 0.202        | 0.243        | 0.181        | 0.203        | 0.275        |
| TFT             | no         | default    | <b>0.145</b> | <b>0.163</b> | <b>0.222</b> | 0.154        | 0.153        | <b>0.180</b> | 0.189        | 0.197        | 0.247        |
| TFT             | no         | tuned      | <b>0.145</b> | <b>0.163</b> | <b>0.222</b> | 0.154        | 0.153        | <b>0.180</b> | 0.189        | 0.197        | 0.247        |
| TFT             | AGE        | default    | 0.175        | 0.202        | 0.265        | <b>0.149</b> | 0.148        | <b>0.180</b> | 0.173        | 0.184        | 0.239        |
| TFT             | AGE        | tuned      | <b>0.148</b> | <b>0.150</b> | <b>0.199</b> | 0.155        | <b>0.142</b> | 0.182        | 0.172        | 0.187        | 0.223        |
| TFT             | LC         | default    | <b>0.145</b> | <b>0.161</b> | <b>0.210</b> | <b>0.137</b> | <b>0.143</b> | 0.187        | 0.183        | 0.197        | 0.258        |
| TFT             | LC         | tuned      | 0.149        | 0.180        | 0.229        | 0.160        | <b>0.145</b> | 0.196        | 0.159        | 0.186        | <b>0.187</b> |
| TFT             | AGE+LC     | default    | 0.171        | 0.201        | 0.263        | 0.151        | 0.151        | 0.191        | 0.184        | 0.198        | 0.264        |
| TFT             | AGE+LC     | tuned      | 0.182        | 0.174        | 0.254        | <b>0.142</b> | 0.149        | 0.188        | 0.170        | 0.208        | 0.217        |
| DeepAR          | no         | default    | 0.211        | 0.245        | 0.297        | 0.162        | 0.163        | 0.199        | <b>0.142</b> | <b>0.164</b> | 0.214        |
| DeepAR          | no         | tuned      | 0.193        | 0.232        | 0.271        | 0.179        | 0.180        | <b>0.164</b> | <b>0.146</b> | 0.169        | <b>0.209</b> |
| DeepAR          | AGE        | default    | 0.224        | 0.264        | 0.321        | 0.195        | 0.197        | 0.237        | 0.166        | 0.195        | 0.258        |
| DeepAR          | AGE        | tuned      | 0.159        | 0.192        | 0.238        | 0.157        | 0.160        | 0.184        | 0.147        | <b>0.167</b> | <b>0.205</b> |
| DeepAR          | LC         | default    | 0.233        | 0.279        | 0.341        | 0.201        | 0.200        | 0.251        | 0.182        | 0.212        | 0.283        |
| DeepAR          | LC         | tuned      | 0.169        | 0.205        | 0.313        | 0.152        | 0.155        | 0.187        | 0.147        | <b>0.164</b> | 0.236        |
| DeepAR          | AGE+LC     | default    | 0.241        | 0.293        | 0.361        | 0.230        | 0.226        | 0.270        | 0.182        | 0.213        | 0.288        |
| DeepAR          | AGE+LC     | tuned      | 0.173        | 0.203        | 0.238        | 0.167        | 0.157        | 0.188        | <b>0.129</b> | 0.203        | 0.260        |



| 21-Days Horizon |            |            | 2014         |              |              | 2015         |              |              | 2016         |              |              |
|-----------------|------------|------------|--------------|--------------|--------------|--------------|--------------|--------------|--------------|--------------|--------------|
| Algorithm       | Covariates | Parameters | MAPE         | MAE          | RMSE         | MAPE         | MAE          | RMSE         | MAPE         | MAE          | RMSE         |
| ARIMA           | no         | default    | <b>0.205</b> | <b>0.330</b> | <b>0.399</b> | 0.230        | 0.297        | 0.359        | 0.244        | 0.254        | 0.296        |
| ARIMA           | no         | tuned      | <b>0.205</b> | <b>0.330</b> | <b>0.399</b> | 0.230        | 0.297        | 0.359        | 0.244        | 0.254        | 0.296        |
| SARIMA          | no         | default    | <b>0.205</b> | <b>0.330</b> | <b>0.399</b> | 0.230        | 0.297        | 0.359        | 0.244        | 0.254        | 0.296        |
| SARIMA          | no         | tuned      | 0.226        | 0.390        | 0.508        | 0.245        | 0.307        | 0.413        | 0.277        | 0.257        | 0.296        |
| ETS             | no         | default    | <b>0.205</b> | <b>0.330</b> | <b>0.399</b> | 0.230        | 0.297        | 0.359        | 0.244        | 0.254        | 0.296        |
| ETS             | no         | tuned      | 0.226        | 0.390        | 0.508        | 0.245        | 0.307        | 0.413        | 0.277        | 0.257        | 0.296        |
| Theta           | no         | default    | <b>0.205</b> | <b>0.330</b> | <b>0.399</b> | 0.230        | 0.297        | 0.359        | 0.244        | 0.254        | 0.296        |
| Theta           | no         | tuned      | 0.226        | 0.390        | 0.508        | 0.245        | 0.307        | 0.413        | 0.277        | 0.257        | 0.296        |
| CrostonSBA      | no         | default    | <b>0.205</b> | <b>0.330</b> | <b>0.399</b> | 0.230        | 0.297        | 0.359        | 0.244        | 0.254        | 0.296        |
| CrostonSBA      | no         | tuned      | <b>0.205</b> | <b>0.330</b> | <b>0.399</b> | 0.230        | 0.297        | 0.359        | 0.244        | 0.254        | 0.296        |
| NPTS            | no         | default    | 0.625        | 1.019        | 1.067        | 0.583        | 0.845        | 0.892        | 0.537        | 0.577        | 0.603        |
| NPTS            | no         | tuned      | 0.405        | 0.618        | 0.776        | 0.249        | 0.311        | 0.392        | 0.418        | 0.417        | 0.477        |
| PatchTST        | no         | default    | 0.285        | 0.449        | 0.531        | 0.196        | 0.264        | 0.340        | 0.266        | 0.276        | 0.328        |
| PatchTST        | no         | tuned      | 0.272        | 0.463        | 0.539        | 0.174        | 0.255        | 0.293        | 0.211        | 0.227        | 0.293        |
| Chronos         | no         | default    | 0.240        | 0.400        | 0.478        | 0.228        | 0.314        | 0.385        | 0.275        | 0.292        | 0.348        |
| Chronos         | no         | tuned      | 0.237        | 0.389        | 0.475        | 0.237        | 0.303        | 0.362        | 0.236        | 0.246        | 0.288        |
| TFT             | no         | default    | 0.219        | 0.332        | 0.407        | <b>0.145</b> | <b>0.189</b> | <b>0.232</b> | 0.203        | 0.212        | 0.291        |
| TFT             | no         | tuned      | 0.247        | 0.374        | 0.444        | <b>0.150</b> | <b>0.188</b> | <b>0.235</b> | 0.203        | 0.212        | 0.291        |
| TFT             | AGE        | default    | <b>0.214</b> | <b>0.323</b> | <b>0.394</b> | <b>0.155</b> | <b>0.193</b> | <b>0.241</b> | 0.215        | 0.231        | 0.296        |
| TFT             | AGE        | tuned      | 0.246        | 0.386        | 0.453        | 0.194        | 0.244        | 0.312        | 0.215        | 0.231        | 0.296        |
| TFT             | LC         | default    | 0.280        | 0.416        | 0.568        | 0.293        | 0.387        | 0.480        | <b>0.165</b> | <b>0.176</b> | <b>0.222</b> |
| TFT             | LC         | tuned      | 0.338        | 0.492        | 0.591        | 0.233        | 0.330        | 0.404        | 0.232        | 0.242        | 0.299        |
| TFT             | AGE+LC     | default    | 0.306        | 0.471        | 0.615        | 0.299        | 0.411        | 0.519        | <b>0.187</b> | <b>0.191</b> | <b>0.247</b> |
| TFT             | AGE+LC     | tuned      | 0.278        | 0.416        | 0.474        | 0.247        | 0.314        | 0.404        | 0.239        | 0.240        | 0.323        |
| DeepAR          | no         | default    | 0.248        | 0.407        | 0.552        | 0.260        | 0.342        | 0.424        | 0.218        | 0.226        | 0.276        |
| DeepAR          | no         | tuned      | 0.217        | 0.366        | 0.472        | 0.298        | 0.379        | 0.503        | 0.237        | 0.250        | 0.291        |
| DeepAR          | AGE        | default    | 0.266        | 0.399        | 0.483        | 0.287        | 0.382        | 0.496        | 0.222        | 0.228        | 0.272        |
| DeepAR          | AGE        | tuned      | <b>0.198</b> | <b>0.282</b> | <b>0.394</b> | 0.208        | 0.282        | 0.355        | <b>0.189</b> | <b>0.192</b> | <b>0.231</b> |
| DeepAR          | LC         | default    | 0.270        | 0.419        | 0.531        | 0.295        | 0.404        | 0.523        | 0.244        | 0.249        | 0.312        |
| DeepAR          | LC         | tuned      | 0.290        | 0.437        | 0.527        | 0.248        | 0.335        | 0.435        | 0.197        | 0.201        | 0.309        |
| DeepAR          | AGE+LC     | default    | 0.297        | 0.448        | 0.555        | 0.274        | 0.383        | 0.507        | 0.257        | 0.267        | 0.328        |
| DeepAR          | AGE+LC     | tuned      | 0.258        | 0.386        | 0.487        | 0.245        | 0.318        | 0.389        | 0.221        | 0.232        | 0.290        |
| 21-Days Horizon |            |            | 2017         |              |              | 2018         |              |              | 2019         |              |              |
| Algorithm       | Covariates | Parameters | MAPE         | MAE          | RMSE         | MAPE         | MAE          | RMSE         | MAPE         | MAE          | RMSE         |
| ARIMA           | no         | default    | 0.184        | 0.219        | 0.276        | 0.209        | 0.208        | 0.240        | 0.180        | 0.200        | 0.240        |
| ARIMA           | no         | tuned      | 0.184        | 0.219        | 0.276        | 0.209        | 0.208        | 0.240        | 0.180        | 0.200        | 0.240        |
| SARIMA          | no         | default    | 0.184        | 0.219        | 0.276        | 0.209        | 0.208        | 0.240        | 0.180        | 0.200        | 0.240        |
| SARIMA          | no         | tuned      | 0.184        | 0.219        | 0.276        | 0.209        | 0.208        | 0.240        | 0.180        | 0.200        | 0.240        |
| ETS             | no         | default    | 0.184        | 0.219        | 0.276        | 0.209        | 0.208        | 0.240        | 0.180        | 0.200        | 0.240        |
| ETS             | no         | tuned      | 0.184        | 0.219        | 0.276        | 0.209        | 0.208        | 0.240        | 0.180        | 0.200        | 0.240        |
| Theta           | no         | default    | 0.184        | 0.219        | 0.276        | 0.209        | 0.208        | 0.240        | 0.180        | 0.200        | 0.240        |
| Theta           | no         | tuned      | 0.184        | 0.219        | 0.276        | 0.209        | 0.208        | 0.240        | 0.180        | 0.200        | 0.240        |
| CrostonSBA      | no         | default    | 0.184        | 0.219        | 0.276        | 0.209        | 0.208        | 0.240        | 0.180        | 0.200        | 0.240        |
| CrostonSBA      | no         | tuned      | 0.184        | 0.219        | 0.276        | 0.209        | 0.208        | 0.240        | 0.180        | 0.200        | 0.240        |
| NPTS            | no         | default    | 0.562        | 0.709        | 0.748        | 0.576        | 0.617        | 0.655        | 0.554        | 0.640        | 0.677        |
| NPTS            | no         | tuned      | 0.243        | 0.308        | 0.353        | 0.290        | 0.267        | 0.334        | 0.193        | 0.217        | 0.277        |
| PatchTST        | no         | default    | 0.212        | 0.244        | 0.305        | 0.206        | 0.202        | 0.236        | 0.343        | 0.352        | 0.429        |
| PatchTST        | no         | tuned      | 0.192        | 0.222        | 0.262        | 0.182        | 0.188        | 0.231        | 0.260        | 0.272        | 0.316        |
| Chronos         | no         | default    | 0.203        | 0.253        | 0.314        | 0.295        | 0.313        | 0.372        | 0.290        | 0.339        | 0.423        |
| Chronos         | no         | tuned      | 0.160        | 0.195        | 0.254        | 0.238        | 0.237        | 0.271        | 0.194        | 0.216        | 0.268        |
| TFT             | no         | default    | <b>0.147</b> | <b>0.169</b> | <b>0.222</b> | 0.174        | 0.179        | 0.220        | 0.186        | 0.197        | 0.245        |
| TFT             | no         | tuned      | <b>0.147</b> | <b>0.169</b> | <b>0.222</b> | 0.174        | 0.179        | 0.220        | 0.186        | 0.197        | 0.245        |
| TFT             | AGE        | default    | 0.178        | 0.201        | 0.291        | 0.175        | 0.179        | 0.215        | 0.193        | 0.204        | 0.257        |
| TFT             | AGE        | tuned      | <b>0.152</b> | 0.191        | 0.263        | 0.168        | <b>0.165</b> | 0.206        | 0.196        | 0.208        | 0.273        |
| TFT             | LC         | default    | <b>0.133</b> | <b>0.154</b> | <b>0.197</b> | <b>0.148</b> | <b>0.158</b> | 0.204        | 0.190        | 0.203        | 0.283        |
| TFT             | LC         | tuned      | 0.153        | 0.181        | 0.311        | 0.164        | 0.167        | <b>0.192</b> | 0.186        | 0.207        | 0.283        |
| TFT             | AGE+LC     | default    | 0.176        | 0.217        | 0.287        | 0.171        | 0.175        | 0.213        | 0.204        | 0.215        | 0.301        |
| TFT             | AGE+LC     | tuned      | 0.168        | 0.192        | 0.243        | 0.177        | 0.182        | 0.214        | 0.211        | 0.211        | 0.279        |
| DeepAR          | no         | default    | 0.217        | 0.264        | 0.340        | 0.178        | 0.185        | 0.227        | 0.166        | 0.192        | 0.250        |
| DeepAR          | no         | tuned      | 0.163        | <b>0.175</b> | <b>0.233</b> | 0.168        | 0.171        | 0.210        | <b>0.153</b> | <b>0.172</b> | <b>0.216</b> |
| DeepAR          | AGE        | default    | 0.250        | 0.311        | 0.393        | 0.240        | 0.249        | 0.288        | 0.177        | 0.210        | 0.283        |
| DeepAR          | AGE        | tuned      | 0.182        | 0.227        | 0.283        | <b>0.137</b> | <b>0.151</b> | <b>0.192</b> | <b>0.161</b> | <b>0.184</b> | <b>0.219</b> |
| DeepAR          | LC         | default    | 0.258        | 0.323        | 0.399        | 0.251        | 0.255        | 0.303        | 0.210        | 0.248        | 0.327        |
| DeepAR          | LC         | tuned      | 0.198        | 0.254        | 0.375        | 0.173        | 0.185        | 0.221        | 0.167        | 0.188        | 0.280        |
| DeepAR          | AGE+LC     | default    | 0.273        | 0.345        | 0.429        | 0.266        | 0.268        | 0.316        | 0.207        | 0.245        | 0.326        |
| DeepAR          | AGE+LC     | tuned      | 0.176        | 0.228        | 0.287        | <b>0.157</b> | 0.167        | <b>0.200</b> | <b>0.139</b> | <b>0.165</b> | <b>0.212</b> |

**Table S2 – Performance of the algorithms within the benchmark for four different days on the forecasting horizon.**

The performance of the algorithms is expressed by the Mean-Absolute-Percentage-Error (MAPE), Mean-Absolute-Error (MAE), and Root-Mean-Squared-Error (RMSE) for the different validation years. The best performance per column is highlighted in blue, orange highlights the second, and purple is the third-best error score achieved.

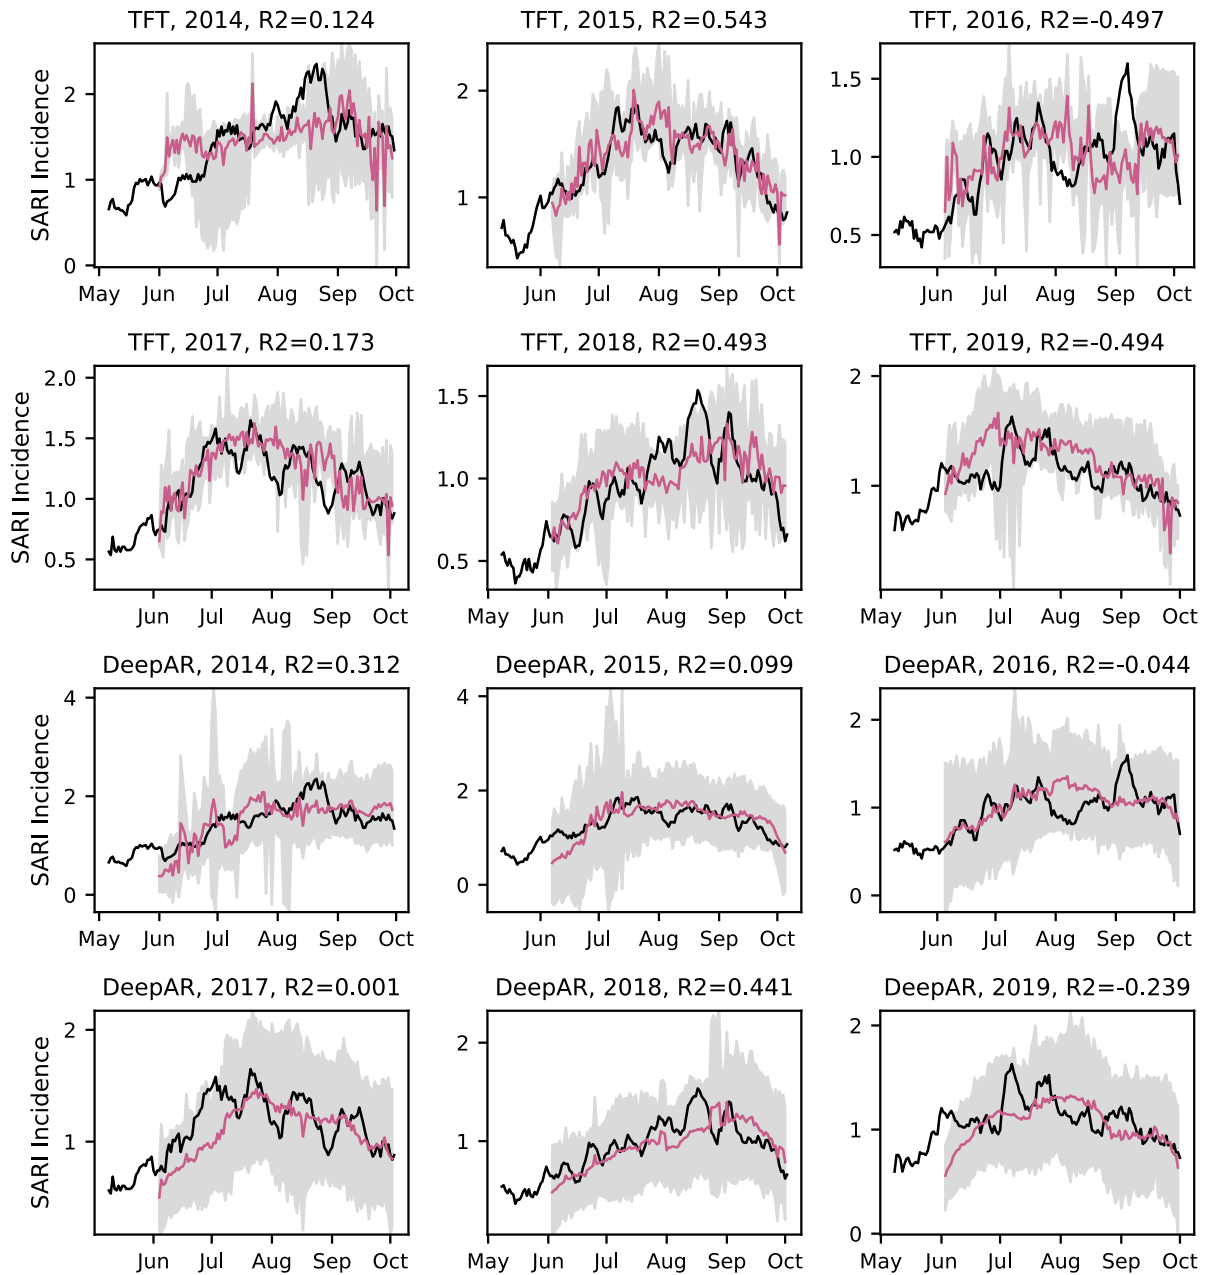

**Figure S5 – Point and probabilistic forecast of the Week 2 forecast compared to the true SARI incidence.**

*Forecasts were extracted from the 1-day walk-forward validation, and the temporal resolution for the point and probabilistic forecasts were changed from daily to weekly. The pink line represents the point forecast, and the shaded area is the 90% confidence interval derived from the probabilistic forecasting as estimated during the model training. The black line shows the truly observed SARI incidence. The validation year is shown in the upper left corner of the corresponding subfigure.*

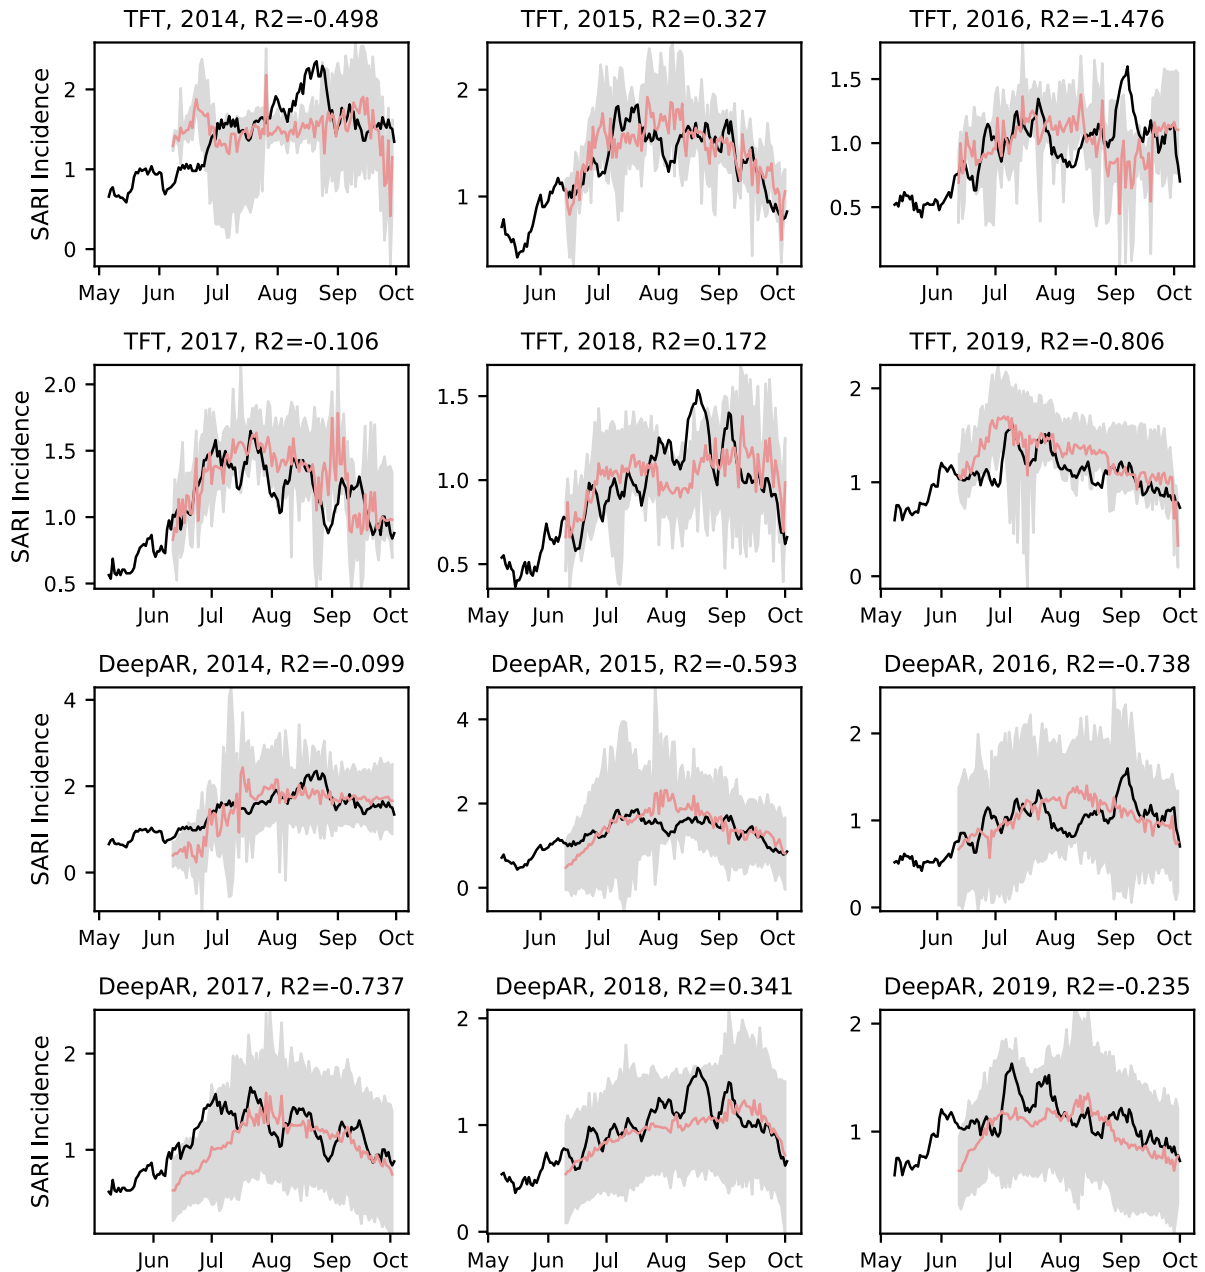

**Figure S6 – Point and probabilistic forecast of the Week 3 forecast compared to the true SARI incidence.**

*Forecasts were extracted from the 1-day walk-forward validation, and the temporal resolution for the point and probabilistic forecasts were changed from daily to weekly. The salmon-colored line represents the point forecast, and the shaded area is the 90% confidence interval derived from the probabilistic forecasting estimated during the model training. The black line shows the truly observed SARI incidence. The validation year is shown in the upper left corner of the corresponding subfigure.*
